# Supplementary material for: Shifts in dominance of benthic communities along a gradient of water temperature and turbidity in tropical coastal ecosystems
Source: PeerJ. 2024 Apr 22;12:e17132. doi: 10.7717/peerj.17132 (PMC11044884; doi:10.7717/peerj.17132)
Supplement: Supplemental Information 7 — The finer benthic groups from all sites (marine lakes and coral reefs) as well as their ennvironmental conditions and characteristics from each sites. These data were used for statistical analysis. [file peerj-12-17132-s007.xlsx]

## Sheet: Read Me
Sheet "Benthic community"
x = number of points for identifying the finer scale benthic groups (the total is 25 points)
spec = finer scale benthic groups as explained in Supplementary material Table S1. The category of major (coarse functional group) and finer-scale benthic groups that are used for the analysis
site_depth = combined site and depth for coral reef sites
site = marine lake and coral reef sites
Depth = measured only for coral reef sites
Location = Coral reef and Marine lake
T = number of transect (total is three transects)
Q = number of quadrant (total is 30 quadrants)
Sheet "Survey data"
Ecosystem = Marine lakes and Coral reefs
Code location = Papua22, Papua21, Papua7, Papua2, Papua3, Papua6, Papua4, Papua18, Papua5, Papua15, Papua11 (for marine lakes) and R1, R2, R3, R4, R5, R6, R7, R8, R9, R10, R11, R12, R13, R14, R15, R16, R17, R18, R19, R20, R21, R22, R23
Temperature = measured insitu temperature for marine lakes
Salinity = measured insitu salinity for marine lakes
Surface area =measured for marine lakes
Maximum depth = measured for marine lakes
Connectivity = measured for marine lakes
Habitat = divided into 5 category as >32°C marine lake, >31-32°C marine lake, <31°C marine lake, Reef 5m, Reef 10m
Shannon index = Shannon diversity index from all sites
Group richness = living benthic group richness from all sites
Distance to human activity = measured for coral reef sites
Latitude = measurement of a location north or south of the Equator (Note: the position of latitude, longitude, UTM_Easting, UTM_Northing of marine lake sites are available upon request to author because this is a fragile ecosystem with some endemic species).
Longitude = measurement of locaction east or west of the prime meridian at Greenwich
UTM_Easting = distance east from a central meridian based on a Cartesian coordinate system
UTM_Northing = distance north or south from the equator based on a Cartesian coordinate system
Hard coral = Branching Acropora, Digitate Acropora, Encrusting Acropora, Submassive Acropora, Tabulate Acropora, Encrusting Acropora, Branching coral, Encrusting coral, Foliose coral, Massive coral, Submassive coral, Mushroom coral, Heliopora, Millepora, Tubipora
Soft coral = Gorgonian, Xenia, other Soft coral
Crustose Coralline Algae = Crustose Coralline Algae
Turfalgae = Turfalgae
Sponge = Ball sponge, Branching sponge, Digitate sponge, Excavating sponge, Tube sponge, Other sponge
Macroalgae = Caulerpa, Cladophora, Halimeda, Padina, Sargassum, Other macroalgae
Benthic cyanobacteria mats = Lyngbya, Red-brown mats, Other Benthic cyanobacteria mats
Bivalvia = Clam, Cockle, Mussel, Oyster
Other invertebrates = Gastropoda Cerithidae, Gastropoda Muricidae, Gastropoda Neritidae, Gastropoda Potamididae, Gastropoda Trochidae, Gastropoda other, Ascidian colonial, Ascidian solitary, Echinoderm Asteroidea, Echinoderm Crinoidea, Echinoderm Echinoidea, Echinoderm Ophiuroidea, Hydrozoa, Polychaeta, Zoanthid, Other biota

## Sheet: Benthic community
X	spec	site_depth	site	Depth	Location	T	Q
1	CO_Fo	R20_10m	R20	10	Coral reef	1	1
2	CY_RB	R20_10m	R20	10	Coral reef	1	1
3	CY_RB	R20_10m	R20	10	Coral reef	1	1
4	SP_En	R20_10m	R20	10	Coral reef	1	1
5	CY_RB	R20_10m	R20	10	Coral reef	1	1
6	SP_En	R20_10m	R20	10	Coral reef	1	1
7	SP_En	R20_10m	R20	10	Coral reef	1	1
8	CY_RB	R20_10m	R20	10	Coral reef	1	1
9	CY_RB	R20_10m	R20	10	Coral reef	1	1
10	CY_RB	R20_10m	R20	10	Coral reef	1	1
11	AL_TA	R20_10m	R20	10	Coral reef	1	1
12	CY_RB	R20_10m	R20	10	Coral reef	1	1
13	SC_Xe	R20_10m	R20	10	Coral reef	1	1
14	SC_Xe	R20_10m	R20	10	Coral reef	1	1
15	SP_En	R20_10m	R20	10	Coral reef	1	1
16	CY_RB	R20_10m	R20	10	Coral reef	1	1
17	CO_En	R20_10m	R20	10	Coral reef	1	1
18	SC_Xe	R20_10m	R20	10	Coral reef	1	1
19	CY_RB	R20_10m	R20	10	Coral reef	1	1
20	CY_RB	R20_10m	R20	10	Coral reef	1	1
21	CO_En	R20_10m	R20	10	Coral reef	1	1
22	CO_En	R20_10m	R20	10	Coral reef	1	1
23	CO_En	R20_10m	R20	10	Coral reef	1	1
24	AC_Br	R20_10m	R20	10	Coral reef	1	1
25	CY_RB	R20_10m	R20	10	Coral reef	1	1
1	CO_Ma	R20_10m	R20	10	Coral reef	1	10
2	CO_Ma	R20_10m	R20	10	Coral reef	1	10
3	CY_RB	R20_10m	R20	10	Coral reef	1	10
4	SP_En	R20_10m	R20	10	Coral reef	1	10
5	AL_TA	R20_10m	R20	10	Coral reef	1	10
6	CO_Ma	R20_10m	R20	10	Coral reef	1	10
7	CO_Ma	R20_10m	R20	10	Coral reef	1	10
8	CO_Ma	R20_10m	R20	10	Coral reef	1	10
9	CY_RB	R20_10m	R20	10	Coral reef	1	10
10	CY_RB	R20_10m	R20	10	Coral reef	1	10
11	CO_Ma	R20_10m	R20	10	Coral reef	1	10
12	CO_Ma	R20_10m	R20	10	Coral reef	1	10
13	SP_En	R20_10m	R20	10	Coral reef	1	10
14	SP_En	R20_10m	R20	10	Coral reef	1	10
15	CY_RB	R20_10m	R20	10	Coral reef	1	10
16	CO_Ma	R20_10m	R20	10	Coral reef	1	10
17	CO_Br	R20_10m	R20	10	Coral reef	1	10
18	CO_Br	R20_10m	R20	10	Coral reef	1	10
19	SP_En	R20_10m	R20	10	Coral reef	1	10
20	SP_En	R20_10m	R20	10	Coral reef	1	10
21	CO_Ma	R20_10m	R20	10	Coral reef	1	10
22	CO_Br	R20_10m	R20	10	Coral reef	1	10
23	CO_Br	R20_10m	R20	10	Coral reef	1	10
24	CO_Br	R20_10m	R20	10	Coral reef	1	10
25	CO_Br	R20_10m	R20	10	Coral reef	1	10
1	CO_Fo	R20_10m	R20	10	Coral reef	1	11
2	CO_Fo	R20_10m	R20	10	Coral reef	1	11
3	CO_Fo	R20_10m	R20	10	Coral reef	1	11
4	CO_Fo	R20_10m	R20	10	Coral reef	1	11
5	CO_Fo	R20_10m	R20	10	Coral reef	1	11
6	CO_Fo	R20_10m	R20	10	Coral reef	1	11
7	CO_Fo	R20_10m	R20	10	Coral reef	1	11
8	CO_Fo	R20_10m	R20	10	Coral reef	1	11
9	CO_Fo	R20_10m	R20	10	Coral reef	1	11
10	CO_Fo	R20_10m	R20	10	Coral reef	1	11
11	CO_Fo	R20_10m	R20	10	Coral reef	1	11
12	CO_Fo	R20_10m	R20	10	Coral reef	1	11
13	CO_Fo	R20_10m	R20	10	Coral reef	1	11
14	CO_Fo	R20_10m	R20	10	Coral reef	1	11
15	OT_AC	R20_10m	R20	10	Coral reef	1	11
16	CO_Fo	R20_10m	R20	10	Coral reef	1	11
17	AC_Br	R20_10m	R20	10	Coral reef	1	11
18	AC_Br	R20_10m	R20	10	Coral reef	1	11
19	AL_TA	R20_10m	R20	10	Coral reef	1	11
20	SP_En	R20_10m	R20	10	Coral reef	1	11
21	CO_Fo	R20_10m	R20	10	Coral reef	1	11
22	CO_Fo	R20_10m	R20	10	Coral reef	1	11
23	AC_Br	R20_10m	R20	10	Coral reef	1	11
24	AL_TA	R20_10m	R20	10	Coral reef	1	11
25	AL_TA	R20_10m	R20	10	Coral reef	1	11
1	CO_Fo	R20_10m	R20	10	Coral reef	1	12
2	SC_Xe	R20_10m	R20	10	Coral reef	1	12
3	SC_Xe	R20_10m	R20	10	Coral reef	1	12
4	SC_Xe	R20_10m	R20	10	Coral reef	1	12
5	CY_RB	R20_10m	R20	10	Coral reef	1	12
6	CO_Fo	R20_10m	R20	10	Coral reef	1	12
7	CO_Fo	R20_10m	R20	10	Coral reef	1	12
8	CO_Fo	R20_10m	R20	10	Coral reef	1	12
9	SC_Xe	R20_10m	R20	10	Coral reef	1	12
10	SC_Xe	R20_10m	R20	10	Coral reef	1	12
11	CO_Fo	R20_10m	R20	10	Coral reef	1	12
12	CO_Fo	R20_10m	R20	10	Coral reef	1	12
13	CO_Fo	R20_10m	R20	10	Coral reef	1	12
14	SP_En	R20_10m	R20	10	Coral reef	1	12
15	SC_Xe	R20_10m	R20	10	Coral reef	1	12
16	CO_Fo	R20_10m	R20	10	Coral reef	1	12
17	CO_Fo	R20_10m	R20	10	Coral reef	1	12
18	CO_Fo	R20_10m	R20	10	Coral reef	1	12
19	CY_RB	R20_10m	R20	10	Coral reef	1	12
20	SP_OT	R20_10m	R20	10	Coral reef	1	12
21	CO_Fo	R20_10m	R20	10	Coral reef	1	12
22	CO_Fo	R20_10m	R20	10	Coral reef	1	12
23	CO_Fo	R20_10m	R20	10	Coral reef	1	12
24	CY_RB	R20_10m	R20	10	Coral reef	1	12
25	CY_RB	R20_10m	R20	10	Coral reef	1	12
1	CO_En	R20_10m	R20	10	Coral reef	1	13
2	AL_TA	R20_10m	R20	10	Coral reef	1	13
3	CO_Fo	R20_10m	R20	10	Coral reef	1	13
4	CO_Fo	R20_10m	R20	10	Coral reef	1	13
5	CO_Fo	R20_10m	R20	10	Coral reef	1	13
6	CO_En	R20_10m	R20	10	Coral reef	1	13
7	CY_RB	R20_10m	R20	10	Coral reef	1	13
8	CO_Fo	R20_10m	R20	10	Coral reef	1	13
9	AL_CA	R20_10m	R20	10	Coral reef	1	13
10	CO_Fo	R20_10m	R20	10	Coral reef	1	13
11	CY_RB	R20_10m	R20	10	Coral reef	1	13
12	AL_TA	R20_10m	R20	10	Coral reef	1	13
13	OT_EC	R20_10m	R20	10	Coral reef	1	13
14	CO_Fo	R20_10m	R20	10	Coral reef	1	13
15	CO_Fo	R20_10m	R20	10	Coral reef	1	13
16	AL_TA	R20_10m	R20	10	Coral reef	1	13
17	AL_TA	R20_10m	R20	10	Coral reef	1	13
18	OT_EC	R20_10m	R20	10	Coral reef	1	13
19	CO_Fo	R20_10m	R20	10	Coral reef	1	13
20	CO_Fo	R20_10m	R20	10	Coral reef	1	13
21	SC_Xe	R20_10m	R20	10	Coral reef	1	13
22	CY_RB	R20_10m	R20	10	Coral reef	1	13
23	AL_TA	R20_10m	R20	10	Coral reef	1	13
24	SU_Ru	R20_10m	R20	10	Coral reef	1	13
25	CO_Fo	R20_10m	R20	10	Coral reef	1	13
1	SC_OT	R20_10m	R20	10	Coral reef	1	14
2	SC_OT	R20_10m	R20	10	Coral reef	1	14
3	SC_OT	R20_10m	R20	10	Coral reef	1	14
4	AL_TA	R20_10m	R20	10	Coral reef	1	14
5	AL_TA	R20_10m	R20	10	Coral reef	1	14
6	SC_OT	R20_10m	R20	10	Coral reef	1	14
7	SC_OT	R20_10m	R20	10	Coral reef	1	14
8	SC_OT	R20_10m	R20	10	Coral reef	1	14
9	SC_OT	R20_10m	R20	10	Coral reef	1	14
10	AL_TA	R20_10m	R20	10	Coral reef	1	14
11	SC_OT	R20_10m	R20	10	Coral reef	1	14
12	SC_OT	R20_10m	R20	10	Coral reef	1	14
13	SC_OT	R20_10m	R20	10	Coral reef	1	14
14	SC_OT	R20_10m	R20	10	Coral reef	1	14
15	SC_OT	R20_10m	R20	10	Coral reef	1	14
16	SC_OT	R20_10m	R20	10	Coral reef	1	14
17	SC_OT	R20_10m	R20	10	Coral reef	1	14
18	SC_OT	R20_10m	R20	10	Coral reef	1	14
19	SC_OT	R20_10m	R20	10	Coral reef	1	14
20	CY_RB	R20_10m	R20	10	Coral reef	1	14
21	SC_OT	R20_10m	R20	10	Coral reef	1	14
22	SC_OT	R20_10m	R20	10	Coral reef	1	14
23	AL_TA	R20_10m	R20	10	Coral reef	1	14
24	CO_Fo	R20_10m	R20	10	Coral reef	1	14
25	CO_Fo	R20_10m	R20	10	Coral reef	1	14
1	AL_TA	R20_10m	R20	10	Coral reef	1	15
2	CY_RB	R20_10m	R20	10	Coral reef	1	15
3	SC_Xe	R20_10m	R20	10	Coral reef	1	15
4	AL_TA	R20_10m	R20	10	Coral reef	1	15
5	OT_AC	R20_10m	R20	10	Coral reef	1	15
6	OT_AC	R20_10m	R20	10	Coral reef	1	15
7	CY_RB	R20_10m	R20	10	Coral reef	1	15
8	CY_RB	R20_10m	R20	10	Coral reef	1	15
9	AL_TA	R20_10m	R20	10	Coral reef	1	15
10	OT_AC	R20_10m	R20	10	Coral reef	1	15
11	CY_RB	R20_10m	R20	10	Coral reef	1	15
12	AL_TA	R20_10m	R20	10	Coral reef	1	15
13	SP_Tu	R20_10m	R20	10	Coral reef	1	15
14	SP_Tu	R20_10m	R20	10	Coral reef	1	15
15	AL_TA	R20_10m	R20	10	Coral reef	1	15
16	AL_TA	R20_10m	R20	10	Coral reef	1	15
17	SP_En	R20_10m	R20	10	Coral reef	1	15
18	CO_Fo	R20_10m	R20	10	Coral reef	1	15
19	SP_Tu	R20_10m	R20	10	Coral reef	1	15
20	AL_TA	R20_10m	R20	10	Coral reef	1	15
21	CO_Fo	R20_10m	R20	10	Coral reef	1	15
22	CO_Fo	R20_10m	R20	10	Coral reef	1	15
23	AL_TA	R20_10m	R20	10	Coral reef	1	15
24	CO_Fo	R20_10m	R20	10	Coral reef	1	15
25	CO_Fo	R20_10m	R20	10	Coral reef	1	15
1	AL_TA	R20_10m	R20	10	Coral reef	1	16
2	CY_RB	R20_10m	R20	10	Coral reef	1	16
3	AL_TA	R20_10m	R20	10	Coral reef	1	16
4	CY_RB	R20_10m	R20	10	Coral reef	1	16
5	SU_Ru	R20_10m	R20	10	Coral reef	1	16
6	SU_Ru	R20_10m	R20	10	Coral reef	1	16
7	SU_Ru	R20_10m	R20	10	Coral reef	1	16
8	CY_RB	R20_10m	R20	10	Coral reef	1	16
9	SU_Sa	R20_10m	R20	10	Coral reef	1	16
10	CY_RB	R20_10m	R20	10	Coral reef	1	16
11	CY_RB	R20_10m	R20	10	Coral reef	1	16
12	AL_TA	R20_10m	R20	10	Coral reef	1	16
13	AL_TA	R20_10m	R20	10	Coral reef	1	16
14	AL_TA	R20_10m	R20	10	Coral reef	1	16
15	AL_TA	R20_10m	R20	10	Coral reef	1	16
16	CY_RB	R20_10m	R20	10	Coral reef	1	16
17	AL_CA	R20_10m	R20	10	Coral reef	1	16
18	AL_TA	R20_10m	R20	10	Coral reef	1	16
19	AL_TA	R20_10m	R20	10	Coral reef	1	16
20	CY_RB	R20_10m	R20	10	Coral reef	1	16
21	AL_TA	R20_10m	R20	10	Coral reef	1	16
22	AL_TA	R20_10m	R20	10	Coral reef	1	16
23	SC_OT	R20_10m	R20	10	Coral reef	1	16
24	SC_OT	R20_10m	R20	10	Coral reef	1	16
25	CO_Fo	R20_10m	R20	10	Coral reef	1	16
1	AC_Tb	R20_10m	R20	10	Coral reef	1	17
2	AL_TA	R20_10m	R20	10	Coral reef	1	17
3	AL_TA	R20_10m	R20	10	Coral reef	1	17
4	AL_TA	R20_10m	R20	10	Coral reef	1	17
5	CY_RB	R20_10m	R20	10	Coral reef	1	17
6	SU_Sa	R20_10m	R20	10	Coral reef	1	17
7	SU_Sa	R20_10m	R20	10	Coral reef	1	17
8	SC_Xe	R20_10m	R20	10	Coral reef	1	17
9	CY_RB	R20_10m	R20	10	Coral reef	1	17
10	CY_RB	R20_10m	R20	10	Coral reef	1	17
11	CY_RB	R20_10m	R20	10	Coral reef	1	17
12	OT_AC	R20_10m	R20	10	Coral reef	1	17
13	SC_Xe	R20_10m	R20	10	Coral reef	1	17
14	SU_Ru	R20_10m	R20	10	Coral reef	1	17
15	AL_TA	R20_10m	R20	10	Coral reef	1	17
16	AL_TA	R20_10m	R20	10	Coral reef	1	17
17	CY_RB	R20_10m	R20	10	Coral reef	1	17
18	SU_Ru	R20_10m	R20	10	Coral reef	1	17
19	OT_AC	R20_10m	R20	10	Coral reef	1	17
20	AL_TA	R20_10m	R20	10	Coral reef	1	17
21	AL_TA	R20_10m	R20	10	Coral reef	1	17
22	AL_TA	R20_10m	R20	10	Coral reef	1	17
23	CY_RB	R20_10m	R20	10	Coral reef	1	17
24	SU_Ru	R20_10m	R20	10	Coral reef	1	17
25	SU_Ru	R20_10m	R20	10	Coral reef	1	17
1	AC_Tb	R20_10m	R20	10	Coral reef	1	18
2	AC_Tb	R20_10m	R20	10	Coral reef	1	18
3	AC_Tb	R20_10m	R20	10	Coral reef	1	18
4	AC_Tb	R20_10m	R20	10	Coral reef	1	18
5	AC_Tb	R20_10m	R20	10	Coral reef	1	18
6	AC_Tb	R20_10m	R20	10	Coral reef	1	18
7	AC_Tb	R20_10m	R20	10	Coral reef	1	18
8	AC_Tb	R20_10m	R20	10	Coral reef	1	18
9	AC_Tb	R20_10m	R20	10	Coral reef	1	18
10	AC_Tb	R20_10m	R20	10	Coral reef	1	18
11	AC_Tb	R20_10m	R20	10	Coral reef	1	18
12	AC_Tb	R20_10m	R20	10	Coral reef	1	18
13	AC_Tb	R20_10m	R20	10	Coral reef	1	18
14	AC_Tb	R20_10m	R20	10	Coral reef	1	18
15	AC_Tb	R20_10m	R20	10	Coral reef	1	18
16	AC_Tb	R20_10m	R20	10	Coral reef	1	18
17	AC_Tb	R20_10m	R20	10	Coral reef	1	18
18	AC_Tb	R20_10m	R20	10	Coral reef	1	18
19	AC_Tb	R20_10m	R20	10	Coral reef	1	18
20	AC_Tb	R20_10m	R20	10	Coral reef	1	18
21	AC_Tb	R20_10m	R20	10	Coral reef	1	18
22	AC_Tb	R20_10m	R20	10	Coral reef	1	18
23	SU_Ru	R20_10m	R20	10	Coral reef	1	18
24	SU_Ru	R20_10m	R20	10	Coral reef	1	18
25	AL_TA	R20_10m	R20	10	Coral reef	1	18
1	AC_Tb	R20_10m	R20	10	Coral reef	1	19
2	AC_Tb	R20_10m	R20	10	Coral reef	1	19
3	AC_Tb	R20_10m	R20	10	Coral reef	1	19
4	AC_Tb	R20_10m	R20	10	Coral reef	1	19
5	AC_Tb	R20_10m	R20	10	Coral reef	1	19
6	AC_Tb	R20_10m	R20	10	Coral reef	1	19
7	AC_Tb	R20_10m	R20	10	Coral reef	1	19
8	AC_Tb	R20_10m	R20	10	Coral reef	1	19
9	AC_Tb	R20_10m	R20	10	Coral reef	1	19
10	AC_Tb	R20_10m	R20	10	Coral reef	1	19
11	AC_Tb	R20_10m	R20	10	Coral reef	1	19
12	AC_Tb	R20_10m	R20	10	Coral reef	1	19
13	AC_Tb	R20_10m	R20	10	Coral reef	1	19
14	AC_Tb	R20_10m	R20	10	Coral reef	1	19
15	AC_Tb	R20_10m	R20	10	Coral reef	1	19
16	AC_Tb	R20_10m	R20	10	Coral reef	1	19
17	AC_Tb	R20_10m	R20	10	Coral reef	1	19
18	AC_Tb	R20_10m	R20	10	Coral reef	1	19
19	AC_Tb	R20_10m	R20	10	Coral reef	1	19
20	AC_Tb	R20_10m	R20	10	Coral reef	1	19
21	AC_Tb	R20_10m	R20	10	Coral reef	1	19
22	AC_Tb	R20_10m	R20	10	Coral reef	1	19
23	AC_Tb	R20_10m	R20	10	Coral reef	1	19
24	AC_Tb	R20_10m	R20	10	Coral reef	1	19
25	AC_Tb	R20_10m	R20	10	Coral reef	1	19
1	CO_Fo	R20_10m	R20	10	Coral reef	1	2
2	SU_Ru	R20_10m	R20	10	Coral reef	1	2
3	CY_RB	R20_10m	R20	10	Coral reef	1	2
4	SC_Xe	R20_10m	R20	10	Coral reef	1	2
5	CO_Fo	R20_10m	R20	10	Coral reef	1	2
6	CY_RB	R20_10m	R20	10	Coral reef	1	2
7	CO_Br	R20_10m	R20	10	Coral reef	1	2
8	SP_En	R20_10m	R20	10	Coral reef	1	2
9	CY_RB	R20_10m	R20	10	Coral reef	1	2
10	SC_Xe	R20_10m	R20	10	Coral reef	1	2
11	AL_CA	R20_10m	R20	10	Coral reef	1	2
12	CY_RB	R20_10m	R20	10	Coral reef	1	2
13	SC_Xe	R20_10m	R20	10	Coral reef	1	2
14	SC_Xe	R20_10m	R20	10	Coral reef	1	2
15	SP_En	R20_10m	R20	10	Coral reef	1	2
16	AL_TA	R20_10m	R20	10	Coral reef	1	2
17	AL_TA	R20_10m	R20	10	Coral reef	1	2
18	SP_En	R20_10m	R20	10	Coral reef	1	2
19	CY_RB	R20_10m	R20	10	Coral reef	1	2
20	CO_Mu	R20_10m	R20	10	Coral reef	1	2
21	AL_TA	R20_10m	R20	10	Coral reef	1	2
22	SC_OT	R20_10m	R20	10	Coral reef	1	2
23	AL_TA	R20_10m	R20	10	Coral reef	1	2
24	CY_RB	R20_10m	R20	10	Coral reef	1	2
25	SC_OT	R20_10m	R20	10	Coral reef	1	2
1	AC_Tb	R20_10m	R20	10	Coral reef	1	20
2	AC_Tb	R20_10m	R20	10	Coral reef	1	20
3	AC_Tb	R20_10m	R20	10	Coral reef	1	20
4	AC_Tb	R20_10m	R20	10	Coral reef	1	20
5	AC_Tb	R20_10m	R20	10	Coral reef	1	20
6	AC_Tb	R20_10m	R20	10	Coral reef	1	20
7	AC_Tb	R20_10m	R20	10	Coral reef	1	20
8	AC_Tb	R20_10m	R20	10	Coral reef	1	20
9	AC_Tb	R20_10m	R20	10	Coral reef	1	20
10	AC_Tb	R20_10m	R20	10	Coral reef	1	20
11	AC_Tb	R20_10m	R20	10	Coral reef	1	20
12	AC_Tb	R20_10m	R20	10	Coral reef	1	20
13	AC_Tb	R20_10m	R20	10	Coral reef	1	20
14	AC_Tb	R20_10m	R20	10	Coral reef	1	20
15	AC_Tb	R20_10m	R20	10	Coral reef	1	20
16	AC_Tb	R20_10m	R20	10	Coral reef	1	20
17	AC_Tb	R20_10m	R20	10	Coral reef	1	20
18	AC_Tb	R20_10m	R20	10	Coral reef	1	20
19	AC_Tb	R20_10m	R20	10	Coral reef	1	20
20	AC_Tb	R20_10m	R20	10	Coral reef	1	20
21	AC_Tb	R20_10m	R20	10	Coral reef	1	20
22	AC_Tb	R20_10m	R20	10	Coral reef	1	20
23	AC_Tb	R20_10m	R20	10	Coral reef	1	20
24	AC_Tb	R20_10m	R20	10	Coral reef	1	20
25	AC_Tb	R20_10m	R20	10	Coral reef	1	20
1	AC_Tb	R20_10m	R20	10	Coral reef	1	21
2	AC_Tb	R20_10m	R20	10	Coral reef	1	21
3	AC_Tb	R20_10m	R20	10	Coral reef	1	21
4	AC_Tb	R20_10m	R20	10	Coral reef	1	21
5	AC_Tb	R20_10m	R20	10	Coral reef	1	21
6	AC_Tb	R20_10m	R20	10	Coral reef	1	21
7	AC_Tb	R20_10m	R20	10	Coral reef	1	21
8	AC_Tb	R20_10m	R20	10	Coral reef	1	21
9	AC_Tb	R20_10m	R20	10	Coral reef	1	21
10	AC_Tb	R20_10m	R20	10	Coral reef	1	21
11	AC_Tb	R20_10m	R20	10	Coral reef	1	21
12	AC_Tb	R20_10m	R20	10	Coral reef	1	21
13	AC_Tb	R20_10m	R20	10	Coral reef	1	21
14	AC_Tb	R20_10m	R20	10	Coral reef	1	21
15	AC_Tb	R20_10m	R20	10	Coral reef	1	21
16	AC_Tb	R20_10m	R20	10	Coral reef	1	21
17	AC_Tb	R20_10m	R20	10	Coral reef	1	21
18	AC_Tb	R20_10m	R20	10	Coral reef	1	21
19	AC_Tb	R20_10m	R20	10	Coral reef	1	21
20	AC_Tb	R20_10m	R20	10	Coral reef	1	21
21	AC_Tb	R20_10m	R20	10	Coral reef	1	21
22	AC_Tb	R20_10m	R20	10	Coral reef	1	21
23	AC_Tb	R20_10m	R20	10	Coral reef	1	21
24	AC_Tb	R20_10m	R20	10	Coral reef	1	21
25	AC_Tb	R20_10m	R20	10	Coral reef	1	21
1	AC_Tb	R20_10m	R20	10	Coral reef	1	22
2	AC_Tb	R20_10m	R20	10	Coral reef	1	22
3	AC_Tb	R20_10m	R20	10	Coral reef	1	22
4	AC_Tb	R20_10m	R20	10	Coral reef	1	22
5	AC_Tb	R20_10m	R20	10	Coral reef	1	22
6	AC_Tb	R20_10m	R20	10	Coral reef	1	22
7	AC_Tb	R20_10m	R20	10	Coral reef	1	22
8	AC_Tb	R20_10m	R20	10	Coral reef	1	22
9	AC_Tb	R20_10m	R20	10	Coral reef	1	22
10	AC_Tb	R20_10m	R20	10	Coral reef	1	22
11	AC_Tb	R20_10m	R20	10	Coral reef	1	22
12	AC_Tb	R20_10m	R20	10	Coral reef	1	22
13	AC_Tb	R20_10m	R20	10	Coral reef	1	22
14	AC_Tb	R20_10m	R20	10	Coral reef	1	22
15	AC_Tb	R20_10m	R20	10	Coral reef	1	22
16	AC_Tb	R20_10m	R20	10	Coral reef	1	22
17	AC_Tb	R20_10m	R20	10	Coral reef	1	22
18	AC_Tb	R20_10m	R20	10	Coral reef	1	22
19	AC_Tb	R20_10m	R20	10	Coral reef	1	22
20	AC_Tb	R20_10m	R20	10	Coral reef	1	22
21	AC_Tb	R20_10m	R20	10	Coral reef	1	22
22	AC_Tb	R20_10m	R20	10	Coral reef	1	22
23	AC_Tb	R20_10m	R20	10	Coral reef	1	22
24	AC_Tb	R20_10m	R20	10	Coral reef	1	22
25	AC_Tb	R20_10m	R20	10	Coral reef	1	22
1	CO_Fo	R20_10m	R20	10	Coral reef	1	23
2	CO_Fo	R20_10m	R20	10	Coral reef	1	23
3	AC_Br	R20_10m	R20	10	Coral reef	1	23
4	AC_Br	R20_10m	R20	10	Coral reef	1	23
5	AC_Br	R20_10m	R20	10	Coral reef	1	23
6	AL_TA	R20_10m	R20	10	Coral reef	1	23
7	CY_RB	R20_10m	R20	10	Coral reef	1	23
8	AC_Br	R20_10m	R20	10	Coral reef	1	23
9	AC_Br	R20_10m	R20	10	Coral reef	1	23
10	AC_Br	R20_10m	R20	10	Coral reef	1	23
11	SC_Xe	R20_10m	R20	10	Coral reef	1	23
12	CY_RB	R20_10m	R20	10	Coral reef	1	23
13	OT_EC	R20_10m	R20	10	Coral reef	1	23
14	AC_Br	R20_10m	R20	10	Coral reef	1	23
15	AC_Br	R20_10m	R20	10	Coral reef	1	23
16	SC_Xe	R20_10m	R20	10	Coral reef	1	23
17	CO_Fo	R20_10m	R20	10	Coral reef	1	23
18	CO_Fo	R20_10m	R20	10	Coral reef	1	23
19	CO_Fo	R20_10m	R20	10	Coral reef	1	23
20	AC_Br	R20_10m	R20	10	Coral reef	1	23
21	SC_Xe	R20_10m	R20	10	Coral reef	1	23
22	CO_Fo	R20_10m	R20	10	Coral reef	1	23
23	CO_Fo	R20_10m	R20	10	Coral reef	1	23
24	CO_Fo	R20_10m	R20	10	Coral reef	1	23
25	AC_Br	R20_10m	R20	10	Coral reef	1	23
1	AC_Tb	R20_10m	R20	10	Coral reef	1	24
2	CO_Ma	R20_10m	R20	10	Coral reef	1	24
3	SC_OT	R20_10m	R20	10	Coral reef	1	24
4	SC_Xe	R20_10m	R20	10	Coral reef	1	24
5	SC_Xe	R20_10m	R20	10	Coral reef	1	24
6	AC_Tb	R20_10m	R20	10	Coral reef	1	24
7	AC_Tb	R20_10m	R20	10	Coral reef	1	24
8	AC_Tb	R20_10m	R20	10	Coral reef	1	24
9	SP_En	R20_10m	R20	10	Coral reef	1	24
10	AC_Tb	R20_10m	R20	10	Coral reef	1	24
11	AC_Tb	R20_10m	R20	10	Coral reef	1	24
12	AC_Tb	R20_10m	R20	10	Coral reef	1	24
13	AC_Tb	R20_10m	R20	10	Coral reef	1	24
14	AC_Tb	R20_10m	R20	10	Coral reef	1	24
15	AC_Tb	R20_10m	R20	10	Coral reef	1	24
16	AC_Tb	R20_10m	R20	10	Coral reef	1	24
17	AC_Tb	R20_10m	R20	10	Coral reef	1	24
18	AC_Tb	R20_10m	R20	10	Coral reef	1	24
19	AC_Tb	R20_10m	R20	10	Coral reef	1	24
20	AC_Tb	R20_10m	R20	10	Coral reef	1	24
21	AC_Tb	R20_10m	R20	10	Coral reef	1	24
22	AC_Tb	R20_10m	R20	10	Coral reef	1	24
23	AC_Tb	R20_10m	R20	10	Coral reef	1	24
24	AC_Tb	R20_10m	R20	10	Coral reef	1	24
25	AC_Tb	R20_10m	R20	10	Coral reef	1	24
1	SC_OT	R20_10m	R20	10	Coral reef	1	25
2	SC_OT	R20_10m	R20	10	Coral reef	1	25
3	OT_EC	R20_10m	R20	10	Coral reef	1	25
4	CO_Fo	R20_10m	R20	10	Coral reef	1	25
5	CO_Fo	R20_10m	R20	10	Coral reef	1	25
6	CY_RB	R20_10m	R20	10	Coral reef	1	25
7	OT_EC	R20_10m	R20	10	Coral reef	1	25
8	CO_Fo	R20_10m	R20	10	Coral reef	1	25
9	CO_Fo	R20_10m	R20	10	Coral reef	1	25
10	CY_RB	R20_10m	R20	10	Coral reef	1	25
11	CY_RB	R20_10m	R20	10	Coral reef	1	25
12	CO_En	R20_10m	R20	10	Coral reef	1	25
13	CY_RB	R20_10m	R20	10	Coral reef	1	25
14	CY_RB	R20_10m	R20	10	Coral reef	1	25
15	AC_Br	R20_10m	R20	10	Coral reef	1	25
16	CO_En	R20_10m	R20	10	Coral reef	1	25
17	CO_En	R20_10m	R20	10	Coral reef	1	25
18	CO_Mu	R20_10m	R20	10	Coral reef	1	25
19	AC_Br	R20_10m	R20	10	Coral reef	1	25
20	AC_Br	R20_10m	R20	10	Coral reef	1	25
21	CO_Fo	R20_10m	R20	10	Coral reef	1	25
22	CO_Fo	R20_10m	R20	10	Coral reef	1	25
23	CO_Fo	R20_10m	R20	10	Coral reef	1	25
24	AC_Br	R20_10m	R20	10	Coral reef	1	25
25	AC_Br	R20_10m	R20	10	Coral reef	1	25
1	SC_Xe	R20_10m	R20	10	Coral reef	1	26
2	SC_Xe	R20_10m	R20	10	Coral reef	1	26
3	SC_Xe	R20_10m	R20	10	Coral reef	1	26
4	CO_Fo	R20_10m	R20	10	Coral reef	1	26
5	CO_Fo	R20_10m	R20	10	Coral reef	1	26
6	SC_Xe	R20_10m	R20	10	Coral reef	1	26
7	CO_Fo	R20_10m	R20	10	Coral reef	1	26
8	CY_RB	R20_10m	R20	10	Coral reef	1	26
9	CO_Fo	R20_10m	R20	10	Coral reef	1	26
10	CO_Fo	R20_10m	R20	10	Coral reef	1	26
11	SC_Xe	R20_10m	R20	10	Coral reef	1	26
12	SC_Xe	R20_10m	R20	10	Coral reef	1	26
13	CO_Fo	R20_10m	R20	10	Coral reef	1	26
14	CO_Fo	R20_10m	R20	10	Coral reef	1	26
15	CO_Fo	R20_10m	R20	10	Coral reef	1	26
16	CO_Fo	R20_10m	R20	10	Coral reef	1	26
17	CO_Fo	R20_10m	R20	10	Coral reef	1	26
18	OT_EC	R20_10m	R20	10	Coral reef	1	26
19	OT_EC	R20_10m	R20	10	Coral reef	1	26
20	CO_Fo	R20_10m	R20	10	Coral reef	1	26
21	CO_Fo	R20_10m	R20	10	Coral reef	1	26
22	CO_Fo	R20_10m	R20	10	Coral reef	1	26
23	CO_Fo	R20_10m	R20	10	Coral reef	1	26
24	CO_Fo	R20_10m	R20	10	Coral reef	1	26
25	CO_Fo	R20_10m	R20	10	Coral reef	1	26
1	AC_Br	R20_10m	R20	10	Coral reef	1	27
2	OT_HY	R20_10m	R20	10	Coral reef	1	27
3	OT_HY	R20_10m	R20	10	Coral reef	1	27
4	OT_HY	R20_10m	R20	10	Coral reef	1	27
5	OT_HY	R20_10m	R20	10	Coral reef	1	27
6	OT_HY	R20_10m	R20	10	Coral reef	1	27
7	OT_HY	R20_10m	R20	10	Coral reef	1	27
8	OT_HY	R20_10m	R20	10	Coral reef	1	27
9	OT_HY	R20_10m	R20	10	Coral reef	1	27
10	OT_HY	R20_10m	R20	10	Coral reef	1	27
11	OT_HY	R20_10m	R20	10	Coral reef	1	27
12	OT_HY	R20_10m	R20	10	Coral reef	1	27
13	OT_HY	R20_10m	R20	10	Coral reef	1	27
14	OT_HY	R20_10m	R20	10	Coral reef	1	27
15	OT_HY	R20_10m	R20	10	Coral reef	1	27
16	OT_HY	R20_10m	R20	10	Coral reef	1	27
17	OT_HY	R20_10m	R20	10	Coral reef	1	27
18	OT_HY	R20_10m	R20	10	Coral reef	1	27
19	OT_HY	R20_10m	R20	10	Coral reef	1	27
20	OT_HY	R20_10m	R20	10	Coral reef	1	27
21	OT_HY	R20_10m	R20	10	Coral reef	1	27
22	OT_HY	R20_10m	R20	10	Coral reef	1	27
23	OT_HY	R20_10m	R20	10	Coral reef	1	27
24	OT_HY	R20_10m	R20	10	Coral reef	1	27
25	OT_HY	R20_10m	R20	10	Coral reef	1	27
1	SC_OT	R20_10m	R20	10	Coral reef	1	28
2	SP_OT	R20_10m	R20	10	Coral reef	1	28
3	CO_Ma	R20_10m	R20	10	Coral reef	1	28
4	CO_Ma	R20_10m	R20	10	Coral reef	1	28
5	CO_Ma	R20_10m	R20	10	Coral reef	1	28
6	SC_OT	R20_10m	R20	10	Coral reef	1	28
7	CO_Ma	R20_10m	R20	10	Coral reef	1	28
8	CO_Ma	R20_10m	R20	10	Coral reef	1	28
9	CO_Ma	R20_10m	R20	10	Coral reef	1	28
10	CO_Ma	R20_10m	R20	10	Coral reef	1	28
11	SC_Xe	R20_10m	R20	10	Coral reef	1	28
12	CO_Ma	R20_10m	R20	10	Coral reef	1	28
13	CO_Ma	R20_10m	R20	10	Coral reef	1	28
14	CO_Ma	R20_10m	R20	10	Coral reef	1	28
15	CO_Ma	R20_10m	R20	10	Coral reef	1	28
16	AC_Br	R20_10m	R20	10	Coral reef	1	28
17	CO_Ma	R20_10m	R20	10	Coral reef	1	28
18	CO_Ma	R20_10m	R20	10	Coral reef	1	28
19	CO_Ma	R20_10m	R20	10	Coral reef	1	28
20	CO_Ma	R20_10m	R20	10	Coral reef	1	28
21	AC_Br	R20_10m	R20	10	Coral reef	1	28
22	AC_Br	R20_10m	R20	10	Coral reef	1	28
23	CO_Ma	R20_10m	R20	10	Coral reef	1	28
24	CO_Ma	R20_10m	R20	10	Coral reef	1	28
25	CO_Ma	R20_10m	R20	10	Coral reef	1	28
1	SP_OT	R20_10m	R20	10	Coral reef	1	29
2	SP_OT	R20_10m	R20	10	Coral reef	1	29
3	SP_OT	R20_10m	R20	10	Coral reef	1	29
4	SP_OT	R20_10m	R20	10	Coral reef	1	29
5	SP_OT	R20_10m	R20	10	Coral reef	1	29
6	SP_OT	R20_10m	R20	10	Coral reef	1	29
7	SP_OT	R20_10m	R20	10	Coral reef	1	29
8	SP_OT	R20_10m	R20	10	Coral reef	1	29
9	SP_OT	R20_10m	R20	10	Coral reef	1	29
10	SP_OT	R20_10m	R20	10	Coral reef	1	29
11	SP_OT	R20_10m	R20	10	Coral reef	1	29
12	SP_OT	R20_10m	R20	10	Coral reef	1	29
13	SP_OT	R20_10m	R20	10	Coral reef	1	29
14	SP_OT	R20_10m	R20	10	Coral reef	1	29
15	SP_OT	R20_10m	R20	10	Coral reef	1	29
16	SP_OT	R20_10m	R20	10	Coral reef	1	29
17	SP_OT	R20_10m	R20	10	Coral reef	1	29
18	SP_OT	R20_10m	R20	10	Coral reef	1	29
19	SP_OT	R20_10m	R20	10	Coral reef	1	29
20	SP_OT	R20_10m	R20	10	Coral reef	1	29
21	SP_OT	R20_10m	R20	10	Coral reef	1	29
22	SP_OT	R20_10m	R20	10	Coral reef	1	29
23	SC_OT	R20_10m	R20	10	Coral reef	1	29
24	SP_OT	R20_10m	R20	10	Coral reef	1	29
25	SP_OT	R20_10m	R20	10	Coral reef	1	29
1	SC_Xe	R20_10m	R20	10	Coral reef	1	3
2	AC_Br	R20_10m	R20	10	Coral reef	1	3
3	CO_Fo	R20_10m	R20	10	Coral reef	1	3
4	SP_En	R20_10m	R20	10	Coral reef	1	3
5	CO_Mu	R20_10m	R20	10	Coral reef	1	3
6	AC_Br	R20_10m	R20	10	Coral reef	1	3
7	AC_Br	R20_10m	R20	10	Coral reef	1	3
8	CO_Fo	R20_10m	R20	10	Coral reef	1	3
9	CO_Fo	R20_10m	R20	10	Coral reef	1	3
10	AL_TA	R20_10m	R20	10	Coral reef	1	3
11	AC_Br	R20_10m	R20	10	Coral reef	1	3
12	SC_Xe	R20_10m	R20	10	Coral reef	1	3
13	CY_RB	R20_10m	R20	10	Coral reef	1	3
14	OT_AC	R20_10m	R20	10	Coral reef	1	3
15	AL_TA	R20_10m	R20	10	Coral reef	1	3
16	CO_Fo	R20_10m	R20	10	Coral reef	1	3
17	CO_Fo	R20_10m	R20	10	Coral reef	1	3
18	CO_Fo	R20_10m	R20	10	Coral reef	1	3
19	AL_TA	R20_10m	R20	10	Coral reef	1	3
20	SU_Ru	R20_10m	R20	10	Coral reef	1	3
21	CO_Fo	R20_10m	R20	10	Coral reef	1	3
22	CO_Fo	R20_10m	R20	10	Coral reef	1	3
23	AL_TA	R20_10m	R20	10	Coral reef	1	3
24	AL_TA	R20_10m	R20	10	Coral reef	1	3
25	CO_En	R20_10m	R20	10	Coral reef	1	3
1	CY_RB	R20_10m	R20	10	Coral reef	1	30
2	AL_TA	R20_10m	R20	10	Coral reef	1	30
3	SC_OT	R20_10m	R20	10	Coral reef	1	30
4	AL_CA	R20_10m	R20	10	Coral reef	1	30
5	SC_OT	R20_10m	R20	10	Coral reef	1	30
6	AL_TA	R20_10m	R20	10	Coral reef	1	30
7	SC_OT	R20_10m	R20	10	Coral reef	1	30
8	SC_OT	R20_10m	R20	10	Coral reef	1	30
9	CY_RB	R20_10m	R20	10	Coral reef	1	30
10	SC_OT	R20_10m	R20	10	Coral reef	1	30
11	AL_TA	R20_10m	R20	10	Coral reef	1	30
12	SC_OT	R20_10m	R20	10	Coral reef	1	30
13	SC_OT	R20_10m	R20	10	Coral reef	1	30
14	CY_RB	R20_10m	R20	10	Coral reef	1	30
15	SC_OT	R20_10m	R20	10	Coral reef	1	30
16	SC_Xe	R20_10m	R20	10	Coral reef	1	30
17	SC_OT	R20_10m	R20	10	Coral reef	1	30
18	CY_RB	R20_10m	R20	10	Coral reef	1	30
19	CY_RB	R20_10m	R20	10	Coral reef	1	30
20	SC_Xe	R20_10m	R20	10	Coral reef	1	30
21	SC_OT	R20_10m	R20	10	Coral reef	1	30
22	MA_Ha	R20_10m	R20	10	Coral reef	1	30
23	MA_Ha	R20_10m	R20	10	Coral reef	1	30
24	CY_RB	R20_10m	R20	10	Coral reef	1	30
25	SC_Xe	R20_10m	R20	10	Coral reef	1	30
1	CY_RB	R20_10m	R20	10	Coral reef	1	4
2	CY_RB	R20_10m	R20	10	Coral reef	1	4
3	SU_Ru	R20_10m	R20	10	Coral reef	1	4
4	SC_Xe	R20_10m	R20	10	Coral reef	1	4
5	SC_OT	R20_10m	R20	10	Coral reef	1	4
6	AL_CA	R20_10m	R20	10	Coral reef	1	4
7	CY_RB	R20_10m	R20	10	Coral reef	1	4
8	AL_CA	R20_10m	R20	10	Coral reef	1	4
9	AL_CA	R20_10m	R20	10	Coral reef	1	4
10	SC_OT	R20_10m	R20	10	Coral reef	1	4
11	CY_RB	R20_10m	R20	10	Coral reef	1	4
12	CY_RB	R20_10m	R20	10	Coral reef	1	4
13	AC_Br	R20_10m	R20	10	Coral reef	1	4
14	SC_Xe	R20_10m	R20	10	Coral reef	1	4
15	SC_OT	R20_10m	R20	10	Coral reef	1	4
16	SC_OT	R20_10m	R20	10	Coral reef	1	4
17	SP_En	R20_10m	R20	10	Coral reef	1	4
18	SC_Xe	R20_10m	R20	10	Coral reef	1	4
19	CY_RB	R20_10m	R20	10	Coral reef	1	4
20	SC_Xe	R20_10m	R20	10	Coral reef	1	4
21	SC_Xe	R20_10m	R20	10	Coral reef	1	4
22	CO_Fo	R20_10m	R20	10	Coral reef	1	4
23	CO_Fo	R20_10m	R20	10	Coral reef	1	4
24	CY_RB	R20_10m	R20	10	Coral reef	1	4
25	CO_Mu	R20_10m	R20	10	Coral reef	1	4
1	CO_Fo	R20_10m	R20	10	Coral reef	1	5
2	AL_TA	R20_10m	R20	10	Coral reef	1	5
3	AL_TA	R20_10m	R20	10	Coral reef	1	5
4	CO_Fo	R20_10m	R20	10	Coral reef	1	5
5	CO_Fo	R20_10m	R20	10	Coral reef	1	5
6	AL_TA	R20_10m	R20	10	Coral reef	1	5
7	AL_TA	R20_10m	R20	10	Coral reef	1	5
8	AL_TA	R20_10m	R20	10	Coral reef	1	5
9	CO_Fo	R20_10m	R20	10	Coral reef	1	5
10	CO_Fo	R20_10m	R20	10	Coral reef	1	5
11	CY_RB	R20_10m	R20	10	Coral reef	1	5
12	CO_Fo	R20_10m	R20	10	Coral reef	1	5
13	CO_Fo	R20_10m	R20	10	Coral reef	1	5
14	SC_Xe	R20_10m	R20	10	Coral reef	1	5
15	SC_OT	R20_10m	R20	10	Coral reef	1	5
16	AC_Br	R20_10m	R20	10	Coral reef	1	5
17	CO_Fo	R20_10m	R20	10	Coral reef	1	5
18	CY_RB	R20_10m	R20	10	Coral reef	1	5
19	SC_Xe	R20_10m	R20	10	Coral reef	1	5
20	SP_En	R20_10m	R20	10	Coral reef	1	5
21	AL_TA	R20_10m	R20	10	Coral reef	1	5
22	AL_TA	R20_10m	R20	10	Coral reef	1	5
23	CY_RB	R20_10m	R20	10	Coral reef	1	5
24	CY_RB	R20_10m	R20	10	Coral reef	1	5
25	CY_RB	R20_10m	R20	10	Coral reef	1	5
1	AL_TA	R20_10m	R20	10	Coral reef	1	6
2	CY_RB	R20_10m	R20	10	Coral reef	1	6
3	AL_TA	R20_10m	R20	10	Coral reef	1	6
4	CO_En	R20_10m	R20	10	Coral reef	1	6
5	AL_TA	R20_10m	R20	10	Coral reef	1	6
6	CY_RB	R20_10m	R20	10	Coral reef	1	6
7	AL_CA	R20_10m	R20	10	Coral reef	1	6
8	CY_RB	R20_10m	R20	10	Coral reef	1	6
9	CO_Br	R20_10m	R20	10	Coral reef	1	6
10	CO_Fo	R20_10m	R20	10	Coral reef	1	6
11	AL_TA	R20_10m	R20	10	Coral reef	1	6
12	SC_Xe	R20_10m	R20	10	Coral reef	1	6
13	CO_Fo	R20_10m	R20	10	Coral reef	1	6
14	CO_Fo	R20_10m	R20	10	Coral reef	1	6
15	CY_RB	R20_10m	R20	10	Coral reef	1	6
16	CY_RB	R20_10m	R20	10	Coral reef	1	6
17	CO_Fo	R20_10m	R20	10	Coral reef	1	6
18	CO_Fo	R20_10m	R20	10	Coral reef	1	6
19	AL_TA	R20_10m	R20	10	Coral reef	1	6
20	CY_RB	R20_10m	R20	10	Coral reef	1	6
21	CO_Fo	R20_10m	R20	10	Coral reef	1	6
22	AL_TA	R20_10m	R20	10	Coral reef	1	6
23	CO_Fo	R20_10m	R20	10	Coral reef	1	6
24	CO_Fo	R20_10m	R20	10	Coral reef	1	6
25	CO_Fo	R20_10m	R20	10	Coral reef	1	6
1	CO_Fo	R20_10m	R20	10	Coral reef	1	7
2	AL_TA	R20_10m	R20	10	Coral reef	1	7
3	AL_TA	R20_10m	R20	10	Coral reef	1	7
4	CY_RB	R20_10m	R20	10	Coral reef	1	7
5	CY_RB	R20_10m	R20	10	Coral reef	1	7
6	CO_Fo	R20_10m	R20	10	Coral reef	1	7
7	CO_Fo	R20_10m	R20	10	Coral reef	1	7
8	SC_Xe	R20_10m	R20	10	Coral reef	1	7
9	SC_Xe	R20_10m	R20	10	Coral reef	1	7
10	CY_RB	R20_10m	R20	10	Coral reef	1	7
11	CO_Fo	R20_10m	R20	10	Coral reef	1	7
12	AL_CA	R20_10m	R20	10	Coral reef	1	7
13	CO_Fo	R20_10m	R20	10	Coral reef	1	7
14	CO_Fo	R20_10m	R20	10	Coral reef	1	7
15	CO_Fo	R20_10m	R20	10	Coral reef	1	7
16	CO_Fo	R20_10m	R20	10	Coral reef	1	7
17	CO_Fo	R20_10m	R20	10	Coral reef	1	7
18	CO_Fo	R20_10m	R20	10	Coral reef	1	7
19	CO_Fo	R20_10m	R20	10	Coral reef	1	7
20	CO_Fo	R20_10m	R20	10	Coral reef	1	7
21	CO_Fo	R20_10m	R20	10	Coral reef	1	7
22	CO_Fo	R20_10m	R20	10	Coral reef	1	7
23	CO_Fo	R20_10m	R20	10	Coral reef	1	7
24	CO_Fo	R20_10m	R20	10	Coral reef	1	7
25	CO_Fo	R20_10m	R20	10	Coral reef	1	7
1	CY_RB	R20_10m	R20	10	Coral reef	1	8
2	AL_TA	R20_10m	R20	10	Coral reef	1	8
3	CY_RB	R20_10m	R20	10	Coral reef	1	8
4	AL_TA	R20_10m	R20	10	Coral reef	1	8
5	AL_TA	R20_10m	R20	10	Coral reef	1	8
6	CY_RB	R20_10m	R20	10	Coral reef	1	8
7	AL_TA	R20_10m	R20	10	Coral reef	1	8
8	AL_TA	R20_10m	R20	10	Coral reef	1	8
9	AL_TA	R20_10m	R20	10	Coral reef	1	8
10	AL_TA	R20_10m	R20	10	Coral reef	1	8
11	CY_RB	R20_10m	R20	10	Coral reef	1	8
12	CY_RB	R20_10m	R20	10	Coral reef	1	8
13	CY_RB	R20_10m	R20	10	Coral reef	1	8
14	CY_RB	R20_10m	R20	10	Coral reef	1	8
15	AL_TA	R20_10m	R20	10	Coral reef	1	8
16	CO_Fo	R20_10m	R20	10	Coral reef	1	8
17	CO_Fo	R20_10m	R20	10	Coral reef	1	8
18	AL_TA	R20_10m	R20	10	Coral reef	1	8
19	SC_Xe	R20_10m	R20	10	Coral reef	1	8
20	AL_TA	R20_10m	R20	10	Coral reef	1	8
21	CO_Fo	R20_10m	R20	10	Coral reef	1	8
22	SC_Xe	R20_10m	R20	10	Coral reef	1	8
23	SC_Xe	R20_10m	R20	10	Coral reef	1	8
24	AL_TA	R20_10m	R20	10	Coral reef	1	8
25	AL_TA	R20_10m	R20	10	Coral reef	1	8
1	CO_Br	R20_10m	R20	10	Coral reef	1	9
2	CO_Br	R20_10m	R20	10	Coral reef	1	9
3	SP_En	R20_10m	R20	10	Coral reef	1	9
4	AL_TA	R20_10m	R20	10	Coral reef	1	9
5	AL_TA	R20_10m	R20	10	Coral reef	1	9
6	CO_Ma	R20_10m	R20	10	Coral reef	1	9
7	SP_En	R20_10m	R20	10	Coral reef	1	9
8	CO_Br	R20_10m	R20	10	Coral reef	1	9
9	CY_RB	R20_10m	R20	10	Coral reef	1	9
10	SC_Xe	R20_10m	R20	10	Coral reef	1	9
11	CY_RB	R20_10m	R20	10	Coral reef	1	9
12	SC_Xe	R20_10m	R20	10	Coral reef	1	9
13	SC_Go	R20_10m	R20	10	Coral reef	1	9
14	CY_RB	R20_10m	R20	10	Coral reef	1	9
15	SC_Go	R20_10m	R20	10	Coral reef	1	9
16	SP_En	R20_10m	R20	10	Coral reef	1	9
17	CY_RB	R20_10m	R20	10	Coral reef	1	9
18	CO_Br	R20_10m	R20	10	Coral reef	1	9
19	SC_Go	R20_10m	R20	10	Coral reef	1	9
20	AC_Br	R20_10m	R20	10	Coral reef	1	9
21	CY_RB	R20_10m	R20	10	Coral reef	1	9
22	SP_En	R20_10m	R20	10	Coral reef	1	9
23	AL_TA	R20_10m	R20	10	Coral reef	1	9
24	SC_Go	R20_10m	R20	10	Coral reef	1	9
25	AL_TA	R20_10m	R20	10	Coral reef	1	9
1	CO_Fo	R20_10m	R20	10	Coral reef	2	1
2	CO_Fo	R20_10m	R20	10	Coral reef	2	1
3	CO_Fo	R20_10m	R20	10	Coral reef	2	1
4	CO_Fo	R20_10m	R20	10	Coral reef	2	1
5	CO_Fo	R20_10m	R20	10	Coral reef	2	1
6	CO_Fo	R20_10m	R20	10	Coral reef	2	1
7	CO_Fo	R20_10m	R20	10	Coral reef	2	1
8	CO_Fo	R20_10m	R20	10	Coral reef	2	1
9	CO_Fo	R20_10m	R20	10	Coral reef	2	1
10	CO_Fo	R20_10m	R20	10	Coral reef	2	1
11	CO_Fo	R20_10m	R20	10	Coral reef	2	1
12	CO_Fo	R20_10m	R20	10	Coral reef	2	1
13	CO_Fo	R20_10m	R20	10	Coral reef	2	1
14	CO_Fo	R20_10m	R20	10	Coral reef	2	1
15	CO_Fo	R20_10m	R20	10	Coral reef	2	1
16	AL_TA	R20_10m	R20	10	Coral reef	2	1
17	CO_Fo	R20_10m	R20	10	Coral reef	2	1
18	CO_Fo	R20_10m	R20	10	Coral reef	2	1
19	AL_TA	R20_10m	R20	10	Coral reef	2	1
20	CO_Fo	R20_10m	R20	10	Coral reef	2	1
21	AL_TA	R20_10m	R20	10	Coral reef	2	1
22	CO_Fo	R20_10m	R20	10	Coral reef	2	1
23	AL_TA	R20_10m	R20	10	Coral reef	2	1
24	AL_TA	R20_10m	R20	10	Coral reef	2	1
25	CO_Fo	R20_10m	R20	10	Coral reef	2	1
1	CO_Fo	R20_10m	R20	10	Coral reef	2	10
2	CO_Fo	R20_10m	R20	10	Coral reef	2	10
3	CO_Fo	R20_10m	R20	10	Coral reef	2	10
4	CO_Fo	R20_10m	R20	10	Coral reef	2	10
5	CO_Fo	R20_10m	R20	10	Coral reef	2	10
6	CO_Fo	R20_10m	R20	10	Coral reef	2	10
7	CO_Fo	R20_10m	R20	10	Coral reef	2	10
8	CO_Fo	R20_10m	R20	10	Coral reef	2	10
9	CO_Fo	R20_10m	R20	10	Coral reef	2	10
10	CO_Fo	R20_10m	R20	10	Coral reef	2	10
11	CO_Fo	R20_10m	R20	10	Coral reef	2	10
12	CO_Fo	R20_10m	R20	10	Coral reef	2	10
13	CO_Fo	R20_10m	R20	10	Coral reef	2	10
14	CO_Fo	R20_10m	R20	10	Coral reef	2	10
15	CO_Fo	R20_10m	R20	10	Coral reef	2	10
16	CO_Fo	R20_10m	R20	10	Coral reef	2	10
17	CO_Fo	R20_10m	R20	10	Coral reef	2	10
18	CO_Fo	R20_10m	R20	10	Coral reef	2	10
19	CO_Fo	R20_10m	R20	10	Coral reef	2	10
20	CO_Fo	R20_10m	R20	10	Coral reef	2	10
21	CO_Fo	R20_10m	R20	10	Coral reef	2	10
22	CO_Fo	R20_10m	R20	10	Coral reef	2	10
23	CO_Fo	R20_10m	R20	10	Coral reef	2	10
24	CO_Fo	R20_10m	R20	10	Coral reef	2	10
25	CO_Fo	R20_10m	R20	10	Coral reef	2	10
1	CO_Fo	R20_10m	R20	10	Coral reef	2	11
2	CO_Fo	R20_10m	R20	10	Coral reef	2	11
3	CO_Fo	R20_10m	R20	10	Coral reef	2	11
4	SC_Xe	R20_10m	R20	10	Coral reef	2	11
5	SC_Xe	R20_10m	R20	10	Coral reef	2	11
6	SP_En	R20_10m	R20	10	Coral reef	2	11
7	AC_Br	R20_10m	R20	10	Coral reef	2	11
8	SC_Xe	R20_10m	R20	10	Coral reef	2	11
9	SC_Xe	R20_10m	R20	10	Coral reef	2	11
10	CY_RB	R20_10m	R20	10	Coral reef	2	11
11	CY_RB	R20_10m	R20	10	Coral reef	2	11
12	SC_Xe	R20_10m	R20	10	Coral reef	2	11
13	CY_RB	R20_10m	R20	10	Coral reef	2	11
14	CO_Fo	R20_10m	R20	10	Coral reef	2	11
15	CO_Fo	R20_10m	R20	10	Coral reef	2	11
16	SC_Xe	R20_10m	R20	10	Coral reef	2	11
17	CO_Fo	R20_10m	R20	10	Coral reef	2	11
18	CO_Fo	R20_10m	R20	10	Coral reef	2	11
19	CO_Fo	R20_10m	R20	10	Coral reef	2	11
20	CO_Fo	R20_10m	R20	10	Coral reef	2	11
21	CO_Fo	R20_10m	R20	10	Coral reef	2	11
22	CO_Fo	R20_10m	R20	10	Coral reef	2	11
23	CO_Fo	R20_10m	R20	10	Coral reef	2	11
24	CO_Fo	R20_10m	R20	10	Coral reef	2	11
25	CO_Fo	R20_10m	R20	10	Coral reef	2	11
1	CY_RB	R20_10m	R20	10	Coral reef	2	12
2	AC_Br	R20_10m	R20	10	Coral reef	2	12
3	CO_Fo	R20_10m	R20	10	Coral reef	2	12
4	CO_Fo	R20_10m	R20	10	Coral reef	2	12
5	CO_Fo	R20_10m	R20	10	Coral reef	2	12
6	AL_TA	R20_10m	R20	10	Coral reef	2	12
7	CO_Mu	R20_10m	R20	10	Coral reef	2	12
8	CY_RB	R20_10m	R20	10	Coral reef	2	12
9	CO_Fo	R20_10m	R20	10	Coral reef	2	12
10	CO_Fo	R20_10m	R20	10	Coral reef	2	12
11	CY_RB	R20_10m	R20	10	Coral reef	2	12
12	SP_En	R20_10m	R20	10	Coral reef	2	12
13	SP_En	R20_10m	R20	10	Coral reef	2	12
14	SP_En	R20_10m	R20	10	Coral reef	2	12
15	CO_Fo	R20_10m	R20	10	Coral reef	2	12
16	SP_En	R20_10m	R20	10	Coral reef	2	12
17	CO_Fo	R20_10m	R20	10	Coral reef	2	12
18	CO_Fo	R20_10m	R20	10	Coral reef	2	12
19	CO_Fo	R20_10m	R20	10	Coral reef	2	12
20	AC_Br	R20_10m	R20	10	Coral reef	2	12
21	CO_Fo	R20_10m	R20	10	Coral reef	2	12
22	CO_Fo	R20_10m	R20	10	Coral reef	2	12
23	CO_Fo	R20_10m	R20	10	Coral reef	2	12
24	AC_Br	R20_10m	R20	10	Coral reef	2	12
25	AC_Br	R20_10m	R20	10	Coral reef	2	12
1	CO_Fo	R20_10m	R20	10	Coral reef	2	13
2	CO_Fo	R20_10m	R20	10	Coral reef	2	13
3	CO_Fo	R20_10m	R20	10	Coral reef	2	13
4	CO_Fo	R20_10m	R20	10	Coral reef	2	13
5	CO_Fo	R20_10m	R20	10	Coral reef	2	13
6	CO_Fo	R20_10m	R20	10	Coral reef	2	13
7	CO_Fo	R20_10m	R20	10	Coral reef	2	13
8	CO_Fo	R20_10m	R20	10	Coral reef	2	13
9	CO_Fo	R20_10m	R20	10	Coral reef	2	13
10	CO_Fo	R20_10m	R20	10	Coral reef	2	13
11	CO_Fo	R20_10m	R20	10	Coral reef	2	13
12	CO_Fo	R20_10m	R20	10	Coral reef	2	13
13	CO_Fo	R20_10m	R20	10	Coral reef	2	13
14	CO_Fo	R20_10m	R20	10	Coral reef	2	13
15	CO_Fo	R20_10m	R20	10	Coral reef	2	13
16	CO_Fo	R20_10m	R20	10	Coral reef	2	13
17	CO_Fo	R20_10m	R20	10	Coral reef	2	13
18	CO_Fo	R20_10m	R20	10	Coral reef	2	13
19	CO_Fo	R20_10m	R20	10	Coral reef	2	13
20	CO_Fo	R20_10m	R20	10	Coral reef	2	13
21	CO_Fo	R20_10m	R20	10	Coral reef	2	13
22	CO_Fo	R20_10m	R20	10	Coral reef	2	13
23	CO_Fo	R20_10m	R20	10	Coral reef	2	13
24	CO_Fo	R20_10m	R20	10	Coral reef	2	13
25	CO_Fo	R20_10m	R20	10	Coral reef	2	13
1	SC_OT	R20_10m	R20	10	Coral reef	2	14
2	SC_OT	R20_10m	R20	10	Coral reef	2	14
3	CO_Fo	R20_10m	R20	10	Coral reef	2	14
4	CO_Fo	R20_10m	R20	10	Coral reef	2	14
5	CO_Fo	R20_10m	R20	10	Coral reef	2	14
6	SC_OT	R20_10m	R20	10	Coral reef	2	14
7	SC_OT	R20_10m	R20	10	Coral reef	2	14
8	CO_Fo	R20_10m	R20	10	Coral reef	2	14
9	CO_Fo	R20_10m	R20	10	Coral reef	2	14
10	CO_Fo	R20_10m	R20	10	Coral reef	2	14
11	AL_TA	R20_10m	R20	10	Coral reef	2	14
12	CO_Fo	R20_10m	R20	10	Coral reef	2	14
13	CO_Fo	R20_10m	R20	10	Coral reef	2	14
14	CO_Fo	R20_10m	R20	10	Coral reef	2	14
15	CO_Fo	R20_10m	R20	10	Coral reef	2	14
16	CO_Fo	R20_10m	R20	10	Coral reef	2	14
17	CO_Fo	R20_10m	R20	10	Coral reef	2	14
18	CO_Fo	R20_10m	R20	10	Coral reef	2	14
19	CO_Fo	R20_10m	R20	10	Coral reef	2	14
20	CO_Fo	R20_10m	R20	10	Coral reef	2	14
21	CO_Fo	R20_10m	R20	10	Coral reef	2	14
22	CO_Fo	R20_10m	R20	10	Coral reef	2	14
23	CO_Fo	R20_10m	R20	10	Coral reef	2	14
24	CO_Fo	R20_10m	R20	10	Coral reef	2	14
25	CO_Fo	R20_10m	R20	10	Coral reef	2	14
1	CO_Fo	R20_10m	R20	10	Coral reef	2	15
2	AC_Br	R20_10m	R20	10	Coral reef	2	15
3	AC_Br	R20_10m	R20	10	Coral reef	2	15
4	AC_Br	R20_10m	R20	10	Coral reef	2	15
5	CO_Fo	R20_10m	R20	10	Coral reef	2	15
6	AC_Br	R20_10m	R20	10	Coral reef	2	15
7	AC_Br	R20_10m	R20	10	Coral reef	2	15
8	AC_Br	R20_10m	R20	10	Coral reef	2	15
9	CO_Fo	R20_10m	R20	10	Coral reef	2	15
10	CO_Fo	R20_10m	R20	10	Coral reef	2	15
11	AC_Br	R20_10m	R20	10	Coral reef	2	15
12	AC_Br	R20_10m	R20	10	Coral reef	2	15
13	AC_Br	R20_10m	R20	10	Coral reef	2	15
14	CO_Fo	R20_10m	R20	10	Coral reef	2	15
15	CO_Fo	R20_10m	R20	10	Coral reef	2	15
16	CO_Fo	R20_10m	R20	10	Coral reef	2	15
17	CO_Fo	R20_10m	R20	10	Coral reef	2	15
18	CO_Fo	R20_10m	R20	10	Coral reef	2	15
19	CO_Fo	R20_10m	R20	10	Coral reef	2	15
20	CO_Fo	R20_10m	R20	10	Coral reef	2	15
21	CO_Fo	R20_10m	R20	10	Coral reef	2	15
22	AC_Br	R20_10m	R20	10	Coral reef	2	15
23	CO_Fo	R20_10m	R20	10	Coral reef	2	15
24	CO_Fo	R20_10m	R20	10	Coral reef	2	15
25	CO_Fo	R20_10m	R20	10	Coral reef	2	15
1	CO_Fo	R20_10m	R20	10	Coral reef	2	16
2	CO_Fo	R20_10m	R20	10	Coral reef	2	16
3	CO_Fo	R20_10m	R20	10	Coral reef	2	16
4	CO_Fo	R20_10m	R20	10	Coral reef	2	16
5	AC_Tb	R20_10m	R20	10	Coral reef	2	16
6	AC_Br	R20_10m	R20	10	Coral reef	2	16
7	AC_Br	R20_10m	R20	10	Coral reef	2	16
8	CO_Fo	R20_10m	R20	10	Coral reef	2	16
9	CO_Fo	R20_10m	R20	10	Coral reef	2	16
10	CO_Fo	R20_10m	R20	10	Coral reef	2	16
11	AC_Br	R20_10m	R20	10	Coral reef	2	16
12	AC_Br	R20_10m	R20	10	Coral reef	2	16
13	CO_Fo	R20_10m	R20	10	Coral reef	2	16
14	CO_Fo	R20_10m	R20	10	Coral reef	2	16
15	CO_Fo	R20_10m	R20	10	Coral reef	2	16
16	AC_Br	R20_10m	R20	10	Coral reef	2	16
17	AC_Br	R20_10m	R20	10	Coral reef	2	16
18	AC_Br	R20_10m	R20	10	Coral reef	2	16
19	AC_Tb	R20_10m	R20	10	Coral reef	2	16
20	AC_Tb	R20_10m	R20	10	Coral reef	2	16
21	AC_Br	R20_10m	R20	10	Coral reef	2	16
22	AC_Br	R20_10m	R20	10	Coral reef	2	16
23	AC_Br	R20_10m	R20	10	Coral reef	2	16
24	AC_Br	R20_10m	R20	10	Coral reef	2	16
25	AC_Br	R20_10m	R20	10	Coral reef	2	16
1	AL_TA	R20_10m	R20	10	Coral reef	2	17
2	CO_Ma	R20_10m	R20	10	Coral reef	2	17
3	CO_Fo	R20_10m	R20	10	Coral reef	2	17
4	OT_EC	R20_10m	R20	10	Coral reef	2	17
5	CO_Fo	R20_10m	R20	10	Coral reef	2	17
6	AL_TA	R20_10m	R20	10	Coral reef	2	17
7	CO_Fo	R20_10m	R20	10	Coral reef	2	17
8	CO_Fo	R20_10m	R20	10	Coral reef	2	17
9	SP_En	R20_10m	R20	10	Coral reef	2	17
10	CO_Fo	R20_10m	R20	10	Coral reef	2	17
11	AL_TA	R20_10m	R20	10	Coral reef	2	17
12	SC_OT	R20_10m	R20	10	Coral reef	2	17
13	CO_Fo	R20_10m	R20	10	Coral reef	2	17
14	CO_Fo	R20_10m	R20	10	Coral reef	2	17
15	CO_Fo	R20_10m	R20	10	Coral reef	2	17
16	CO_Br	R20_10m	R20	10	Coral reef	2	17
17	CY_RB	R20_10m	R20	10	Coral reef	2	17
18	CO_Fo	R20_10m	R20	10	Coral reef	2	17
19	CO_Fo	R20_10m	R20	10	Coral reef	2	17
20	CO_Fo	R20_10m	R20	10	Coral reef	2	17
21	CO_Fo	R20_10m	R20	10	Coral reef	2	17
22	CO_Br	R20_10m	R20	10	Coral reef	2	17
23	CO_Fo	R20_10m	R20	10	Coral reef	2	17
24	CO_Fo	R20_10m	R20	10	Coral reef	2	17
25	CO_Fo	R20_10m	R20	10	Coral reef	2	17
1	CO_Br	R20_10m	R20	10	Coral reef	2	18
2	CO_Fo	R20_10m	R20	10	Coral reef	2	18
3	CO_Fo	R20_10m	R20	10	Coral reef	2	18
4	SC_Xe	R20_10m	R20	10	Coral reef	2	18
5	AL_TA	R20_10m	R20	10	Coral reef	2	18
6	CO_Fo	R20_10m	R20	10	Coral reef	2	18
7	AL_CA	R20_10m	R20	10	Coral reef	2	18
8	CY_RB	R20_10m	R20	10	Coral reef	2	18
9	AL_CA	R20_10m	R20	10	Coral reef	2	18
10	CO_Ma	R20_10m	R20	10	Coral reef	2	18
11	CO_Fo	R20_10m	R20	10	Coral reef	2	18
12	CY_RB	R20_10m	R20	10	Coral reef	2	18
13	CO_Fo	R20_10m	R20	10	Coral reef	2	18
14	CY_RB	R20_10m	R20	10	Coral reef	2	18
15	CO_Fo	R20_10m	R20	10	Coral reef	2	18
16	CO_Fo	R20_10m	R20	10	Coral reef	2	18
17	AL_TA	R20_10m	R20	10	Coral reef	2	18
18	AL_TA	R20_10m	R20	10	Coral reef	2	18
19	AL_TA	R20_10m	R20	10	Coral reef	2	18
20	AC_Br	R20_10m	R20	10	Coral reef	2	18
21	CO_Fo	R20_10m	R20	10	Coral reef	2	18
22	CO_Fo	R20_10m	R20	10	Coral reef	2	18
23	AL_TA	R20_10m	R20	10	Coral reef	2	18
24	AL_TA	R20_10m	R20	10	Coral reef	2	18
25	SC_OT	R20_10m	R20	10	Coral reef	2	18
1	CO_Br	R20_10m	R20	10	Coral reef	2	19
2	CO_Br	R20_10m	R20	10	Coral reef	2	19
3	CO_Hl	R20_10m	R20	10	Coral reef	2	19
4	CO_Hl	R20_10m	R20	10	Coral reef	2	19
5	CO_Hl	R20_10m	R20	10	Coral reef	2	19
6	CO_Br	R20_10m	R20	10	Coral reef	2	19
7	CO_Br	R20_10m	R20	10	Coral reef	2	19
8	CY_RB	R20_10m	R20	10	Coral reef	2	19
9	CO_Fo	R20_10m	R20	10	Coral reef	2	19
10	AL_TA	R20_10m	R20	10	Coral reef	2	19
11	CO_Br	R20_10m	R20	10	Coral reef	2	19
12	CO_Fo	R20_10m	R20	10	Coral reef	2	19
13	CO_Fo	R20_10m	R20	10	Coral reef	2	19
14	CO_Hl	R20_10m	R20	10	Coral reef	2	19
15	CO_Fo	R20_10m	R20	10	Coral reef	2	19
16	CO_Fo	R20_10m	R20	10	Coral reef	2	19
17	CO_Fo	R20_10m	R20	10	Coral reef	2	19
18	CO_Fo	R20_10m	R20	10	Coral reef	2	19
19	CO_Fo	R20_10m	R20	10	Coral reef	2	19
20	CO_Fo	R20_10m	R20	10	Coral reef	2	19
21	CO_Fo	R20_10m	R20	10	Coral reef	2	19
22	CO_Fo	R20_10m	R20	10	Coral reef	2	19
23	CO_Fo	R20_10m	R20	10	Coral reef	2	19
24	CO_Fo	R20_10m	R20	10	Coral reef	2	19
25	CY_RB	R20_10m	R20	10	Coral reef	2	19
1	CO_Fo	R20_10m	R20	10	Coral reef	2	2
2	CO_Fo	R20_10m	R20	10	Coral reef	2	2
3	CO_Fo	R20_10m	R20	10	Coral reef	2	2
4	CO_Fo	R20_10m	R20	10	Coral reef	2	2
5	CO_Fo	R20_10m	R20	10	Coral reef	2	2
6	CO_Fo	R20_10m	R20	10	Coral reef	2	2
7	CO_Fo	R20_10m	R20	10	Coral reef	2	2
8	CO_Fo	R20_10m	R20	10	Coral reef	2	2
9	CO_Fo	R20_10m	R20	10	Coral reef	2	2
10	CO_Fo	R20_10m	R20	10	Coral reef	2	2
11	CO_Fo	R20_10m	R20	10	Coral reef	2	2
12	CO_Fo	R20_10m	R20	10	Coral reef	2	2
13	CO_Fo	R20_10m	R20	10	Coral reef	2	2
14	CO_Fo	R20_10m	R20	10	Coral reef	2	2
15	CO_Fo	R20_10m	R20	10	Coral reef	2	2
16	CO_Fo	R20_10m	R20	10	Coral reef	2	2
17	CO_Fo	R20_10m	R20	10	Coral reef	2	2
18	CO_Fo	R20_10m	R20	10	Coral reef	2	2
19	CO_Fo	R20_10m	R20	10	Coral reef	2	2
20	CO_Fo	R20_10m	R20	10	Coral reef	2	2
21	CO_Fo	R20_10m	R20	10	Coral reef	2	2
22	CO_Fo	R20_10m	R20	10	Coral reef	2	2
23	CO_Fo	R20_10m	R20	10	Coral reef	2	2
24	CO_Fo	R20_10m	R20	10	Coral reef	2	2
25	CO_Fo	R20_10m	R20	10	Coral reef	2	2
1	CO_Ma	R20_10m	R20	10	Coral reef	2	20
2	CO_Ma	R20_10m	R20	10	Coral reef	2	20
3	CO_Ma	R20_10m	R20	10	Coral reef	2	20
4	CO_Ma	R20_10m	R20	10	Coral reef	2	20
5	CO_Ma	R20_10m	R20	10	Coral reef	2	20
6	CO_Ma	R20_10m	R20	10	Coral reef	2	20
7	CO_Ma	R20_10m	R20	10	Coral reef	2	20
8	CO_Ma	R20_10m	R20	10	Coral reef	2	20
9	CO_Ma	R20_10m	R20	10	Coral reef	2	20
10	CO_Ma	R20_10m	R20	10	Coral reef	2	20
11	CO_Ma	R20_10m	R20	10	Coral reef	2	20
12	CO_Ma	R20_10m	R20	10	Coral reef	2	20
13	CO_Ma	R20_10m	R20	10	Coral reef	2	20
14	CO_Ma	R20_10m	R20	10	Coral reef	2	20
15	CO_Ma	R20_10m	R20	10	Coral reef	2	20
16	AL_TA	R20_10m	R20	10	Coral reef	2	20
17	CO_Ma	R20_10m	R20	10	Coral reef	2	20
18	CO_Ma	R20_10m	R20	10	Coral reef	2	20
19	CO_Ma	R20_10m	R20	10	Coral reef	2	20
20	CO_Ma	R20_10m	R20	10	Coral reef	2	20
21	CO_Ma	R20_10m	R20	10	Coral reef	2	20
22	AC_Br	R20_10m	R20	10	Coral reef	2	20
23	AC_Br	R20_10m	R20	10	Coral reef	2	20
24	AC_Br	R20_10m	R20	10	Coral reef	2	20
25	CO_Ma	R20_10m	R20	10	Coral reef	2	20
1	SU_Sa	R20_10m	R20	10	Coral reef	2	21
2	SU_Sa	R20_10m	R20	10	Coral reef	2	21
3	AC_Di	R20_10m	R20	10	Coral reef	2	21
4	AC_Di	R20_10m	R20	10	Coral reef	2	21
5	AC_Di	R20_10m	R20	10	Coral reef	2	21
6	SU_Sa	R20_10m	R20	10	Coral reef	2	21
7	SU_Sa	R20_10m	R20	10	Coral reef	2	21
8	AC_Di	R20_10m	R20	10	Coral reef	2	21
9	AC_Di	R20_10m	R20	10	Coral reef	2	21
10	AC_Di	R20_10m	R20	10	Coral reef	2	21
11	SU_Sa	R20_10m	R20	10	Coral reef	2	21
12	AC_Br	R20_10m	R20	10	Coral reef	2	21
13	AC_Di	R20_10m	R20	10	Coral reef	2	21
14	AC_Di	R20_10m	R20	10	Coral reef	2	21
15	AC_Di	R20_10m	R20	10	Coral reef	2	21
16	SU_Sa	R20_10m	R20	10	Coral reef	2	21
17	CO_En	R20_10m	R20	10	Coral reef	2	21
18	AC_Di	R20_10m	R20	10	Coral reef	2	21
19	AC_Di	R20_10m	R20	10	Coral reef	2	21
20	AC_Di	R20_10m	R20	10	Coral reef	2	21
21	SU_Sa	R20_10m	R20	10	Coral reef	2	21
22	AL_TA	R20_10m	R20	10	Coral reef	2	21
23	AL_TA	R20_10m	R20	10	Coral reef	2	21
24	AC_Di	R20_10m	R20	10	Coral reef	2	21
25	AC_Di	R20_10m	R20	10	Coral reef	2	21
1	SU_Ru	R20_10m	R20	10	Coral reef	2	22
2	SU_Ru	R20_10m	R20	10	Coral reef	2	22
3	AL_TA	R20_10m	R20	10	Coral reef	2	22
4	SU_Sa	R20_10m	R20	10	Coral reef	2	22
5	CO_Ma	R20_10m	R20	10	Coral reef	2	22
6	SU_Sa	R20_10m	R20	10	Coral reef	2	22
7	AL_TA	R20_10m	R20	10	Coral reef	2	22
8	AL_TA	R20_10m	R20	10	Coral reef	2	22
9	AL_TA	R20_10m	R20	10	Coral reef	2	22
10	CO_Ma	R20_10m	R20	10	Coral reef	2	22
11	SU_Sa	R20_10m	R20	10	Coral reef	2	22
12	AL_TA	R20_10m	R20	10	Coral reef	2	22
13	SU_Sa	R20_10m	R20	10	Coral reef	2	22
14	AL_TA	R20_10m	R20	10	Coral reef	2	22
15	CO_Ma	R20_10m	R20	10	Coral reef	2	22
16	AL_TA	R20_10m	R20	10	Coral reef	2	22
17	AL_TA	R20_10m	R20	10	Coral reef	2	22
18	AL_TA	R20_10m	R20	10	Coral reef	2	22
19	AL_TA	R20_10m	R20	10	Coral reef	2	22
20	AL_TA	R20_10m	R20	10	Coral reef	2	22
21	AL_TA	R20_10m	R20	10	Coral reef	2	22
22	CY_RB	R20_10m	R20	10	Coral reef	2	22
23	AL_TA	R20_10m	R20	10	Coral reef	2	22
24	SU_Ru	R20_10m	R20	10	Coral reef	2	22
25	SU_Ru	R20_10m	R20	10	Coral reef	2	22
1	CY_RB	R20_10m	R20	10	Coral reef	2	23
2	AL_TA	R20_10m	R20	10	Coral reef	2	23
3	AL_TA	R20_10m	R20	10	Coral reef	2	23
4	SU_Ru	R20_10m	R20	10	Coral reef	2	23
5	AL_TA	R20_10m	R20	10	Coral reef	2	23
6	AL_TA	R20_10m	R20	10	Coral reef	2	23
7	AL_TA	R20_10m	R20	10	Coral reef	2	23
8	AL_TA	R20_10m	R20	10	Coral reef	2	23
9	SU_Ru	R20_10m	R20	10	Coral reef	2	23
10	SU_Ru	R20_10m	R20	10	Coral reef	2	23
11	AL_TA	R20_10m	R20	10	Coral reef	2	23
12	AL_TA	R20_10m	R20	10	Coral reef	2	23
13	AL_TA	R20_10m	R20	10	Coral reef	2	23
14	SU_Ru	R20_10m	R20	10	Coral reef	2	23
15	AL_TA	R20_10m	R20	10	Coral reef	2	23
16	AL_TA	R20_10m	R20	10	Coral reef	2	23
17	SU_Sa	R20_10m	R20	10	Coral reef	2	23
18	SU_Sa	R20_10m	R20	10	Coral reef	2	23
19	SU_Sa	R20_10m	R20	10	Coral reef	2	23
20	SU_Sa	R20_10m	R20	10	Coral reef	2	23
21	SU_Sa	R20_10m	R20	10	Coral reef	2	23
22	SU_Sa	R20_10m	R20	10	Coral reef	2	23
23	AL_TA	R20_10m	R20	10	Coral reef	2	23
24	SU_Sa	R20_10m	R20	10	Coral reef	2	23
25	SU_Ru	R20_10m	R20	10	Coral reef	2	23
1	AL_TA	R20_10m	R20	10	Coral reef	2	24
2	CO_En	R20_10m	R20	10	Coral reef	2	24
3	AL_CA	R20_10m	R20	10	Coral reef	2	24
4	AL_TA	R20_10m	R20	10	Coral reef	2	24
5	AC_Tb	R20_10m	R20	10	Coral reef	2	24
6	AL_TA	R20_10m	R20	10	Coral reef	2	24
7	AL_TA	R20_10m	R20	10	Coral reef	2	24
8	AL_CA	R20_10m	R20	10	Coral reef	2	24
9	CY_RB	R20_10m	R20	10	Coral reef	2	24
10	SP_En	R20_10m	R20	10	Coral reef	2	24
11	CY_RB	R20_10m	R20	10	Coral reef	2	24
12	AL_TA	R20_10m	R20	10	Coral reef	2	24
13	AC_Br	R20_10m	R20	10	Coral reef	2	24
14	CY_RB	R20_10m	R20	10	Coral reef	2	24
15	SP_Br	R20_10m	R20	10	Coral reef	2	24
16	AL_TA	R20_10m	R20	10	Coral reef	2	24
17	SU_Sa	R20_10m	R20	10	Coral reef	2	24
18	CY_RB	R20_10m	R20	10	Coral reef	2	24
19	AL_TA	R20_10m	R20	10	Coral reef	2	24
20	SP_En	R20_10m	R20	10	Coral reef	2	24
21	SP_Br	R20_10m	R20	10	Coral reef	2	24
22	SU_Sa	R20_10m	R20	10	Coral reef	2	24
23	CO_Fo	R20_10m	R20	10	Coral reef	2	24
24	CO_Fo	R20_10m	R20	10	Coral reef	2	24
25	SP_En	R20_10m	R20	10	Coral reef	2	24
1	SC_OT	R20_10m	R20	10	Coral reef	2	25
2	CY_RB	R20_10m	R20	10	Coral reef	2	25
3	CO_Fo	R20_10m	R20	10	Coral reef	2	25
4	CO_Fo	R20_10m	R20	10	Coral reef	2	25
5	CO_Fo	R20_10m	R20	10	Coral reef	2	25
6	SP_En	R20_10m	R20	10	Coral reef	2	25
7	SC_OT	R20_10m	R20	10	Coral reef	2	25
8	CO_Fo	R20_10m	R20	10	Coral reef	2	25
9	CO_Fo	R20_10m	R20	10	Coral reef	2	25
10	CO_Fo	R20_10m	R20	10	Coral reef	2	25
11	SC_OT	R20_10m	R20	10	Coral reef	2	25
12	SC_OT	R20_10m	R20	10	Coral reef	2	25
13	SC_OT	R20_10m	R20	10	Coral reef	2	25
14	CO_Fo	R20_10m	R20	10	Coral reef	2	25
15	CO_Fo	R20_10m	R20	10	Coral reef	2	25
16	CY_RB	R20_10m	R20	10	Coral reef	2	25
17	SU_Ru	R20_10m	R20	10	Coral reef	2	25
18	AL_TA	R20_10m	R20	10	Coral reef	2	25
19	CO_Fo	R20_10m	R20	10	Coral reef	2	25
20	CO_Fo	R20_10m	R20	10	Coral reef	2	25
21	AL_TA	R20_10m	R20	10	Coral reef	2	25
22	SU_Ru	R20_10m	R20	10	Coral reef	2	25
23	CY_RB	R20_10m	R20	10	Coral reef	2	25
24	CO_Mu	R20_10m	R20	10	Coral reef	2	25
25	SC_Xe	R20_10m	R20	10	Coral reef	2	25
1	CO_En	R20_10m	R20	10	Coral reef	2	26
2	CO_En	R20_10m	R20	10	Coral reef	2	26
3	AL_TA	R20_10m	R20	10	Coral reef	2	26
4	CO_En	R20_10m	R20	10	Coral reef	2	26
5	CO_En	R20_10m	R20	10	Coral reef	2	26
6	CO_En	R20_10m	R20	10	Coral reef	2	26
7	CO_En	R20_10m	R20	10	Coral reef	2	26
8	AL_TA	R20_10m	R20	10	Coral reef	2	26
9	AL_TA	R20_10m	R20	10	Coral reef	2	26
10	SP_En	R20_10m	R20	10	Coral reef	2	26
11	CO_En	R20_10m	R20	10	Coral reef	2	26
12	CO_En	R20_10m	R20	10	Coral reef	2	26
13	CO_En	R20_10m	R20	10	Coral reef	2	26
14	AL_TA	R20_10m	R20	10	Coral reef	2	26
15	CO_En	R20_10m	R20	10	Coral reef	2	26
16	CO_En	R20_10m	R20	10	Coral reef	2	26
17	CO_En	R20_10m	R20	10	Coral reef	2	26
18	CO_En	R20_10m	R20	10	Coral reef	2	26
19	CO_En	R20_10m	R20	10	Coral reef	2	26
20	CO_En	R20_10m	R20	10	Coral reef	2	26
21	CO_En	R20_10m	R20	10	Coral reef	2	26
22	CO_En	R20_10m	R20	10	Coral reef	2	26
23	CO_En	R20_10m	R20	10	Coral reef	2	26
24	AL_TA	R20_10m	R20	10	Coral reef	2	26
25	CO_En	R20_10m	R20	10	Coral reef	2	26
1	AC_Tb	R20_10m	R20	10	Coral reef	2	27
2	SP_En	R20_10m	R20	10	Coral reef	2	27
3	AL_TA	R20_10m	R20	10	Coral reef	2	27
4	SP_En	R20_10m	R20	10	Coral reef	2	27
5	CO_En	R20_10m	R20	10	Coral reef	2	27
6	AC_Tb	R20_10m	R20	10	Coral reef	2	27
7	SP_En	R20_10m	R20	10	Coral reef	2	27
8	CO_En	R20_10m	R20	10	Coral reef	2	27
9	SP_En	R20_10m	R20	10	Coral reef	2	27
10	CO_En	R20_10m	R20	10	Coral reef	2	27
11	CO_Fo	R20_10m	R20	10	Coral reef	2	27
12	OT_AC	R20_10m	R20	10	Coral reef	2	27
13	CO_En	R20_10m	R20	10	Coral reef	2	27
14	CO_En	R20_10m	R20	10	Coral reef	2	27
15	CO_En	R20_10m	R20	10	Coral reef	2	27
16	CO_Fo	R20_10m	R20	10	Coral reef	2	27
17	CO_En	R20_10m	R20	10	Coral reef	2	27
18	CO_En	R20_10m	R20	10	Coral reef	2	27
19	CO_En	R20_10m	R20	10	Coral reef	2	27
20	CO_En	R20_10m	R20	10	Coral reef	2	27
21	CO_En	R20_10m	R20	10	Coral reef	2	27
22	CO_En	R20_10m	R20	10	Coral reef	2	27
23	CO_En	R20_10m	R20	10	Coral reef	2	27
24	CO_En	R20_10m	R20	10	Coral reef	2	27
25	CO_En	R20_10m	R20	10	Coral reef	2	27
1	CO_En	R20_10m	R20	10	Coral reef	2	28
2	CO_En	R20_10m	R20	10	Coral reef	2	28
3	CO_En	R20_10m	R20	10	Coral reef	2	28
4	SP_En	R20_10m	R20	10	Coral reef	2	28
5	CY_RB	R20_10m	R20	10	Coral reef	2	28
6	CO_En	R20_10m	R20	10	Coral reef	2	28
7	CO_En	R20_10m	R20	10	Coral reef	2	28
8	CO_En	R20_10m	R20	10	Coral reef	2	28
9	OT_AS	R20_10m	R20	10	Coral reef	2	28
10	CY_RB	R20_10m	R20	10	Coral reef	2	28
11	CO_En	R20_10m	R20	10	Coral reef	2	28
12	CO_En	R20_10m	R20	10	Coral reef	2	28
13	CO_En	R20_10m	R20	10	Coral reef	2	28
14	CO_En	R20_10m	R20	10	Coral reef	2	28
15	CO_En	R20_10m	R20	10	Coral reef	2	28
16	CO_En	R20_10m	R20	10	Coral reef	2	28
17	CO_En	R20_10m	R20	10	Coral reef	2	28
18	CO_En	R20_10m	R20	10	Coral reef	2	28
19	CY_RB	R20_10m	R20	10	Coral reef	2	28
20	CO_Ma	R20_10m	R20	10	Coral reef	2	28
21	AC_Br	R20_10m	R20	10	Coral reef	2	28
22	SC_OT	R20_10m	R20	10	Coral reef	2	28
23	SC_OT	R20_10m	R20	10	Coral reef	2	28
24	CO_Ma	R20_10m	R20	10	Coral reef	2	28
25	CO_Ma	R20_10m	R20	10	Coral reef	2	28
1	SC_Xe	R20_10m	R20	10	Coral reef	2	29
2	AL_TA	R20_10m	R20	10	Coral reef	2	29
3	SU_Sa	R20_10m	R20	10	Coral reef	2	29
4	AL_TA	R20_10m	R20	10	Coral reef	2	29
5	AL_TA	R20_10m	R20	10	Coral reef	2	29
6	SC_Xe	R20_10m	R20	10	Coral reef	2	29
7	AL_TA	R20_10m	R20	10	Coral reef	2	29
8	SU_Ru	R20_10m	R20	10	Coral reef	2	29
9	CY_RB	R20_10m	R20	10	Coral reef	2	29
10	AL_TA	R20_10m	R20	10	Coral reef	2	29
11	CY_RB	R20_10m	R20	10	Coral reef	2	29
12	AL_TA	R20_10m	R20	10	Coral reef	2	29
13	AL_TA	R20_10m	R20	10	Coral reef	2	29
14	CY_RB	R20_10m	R20	10	Coral reef	2	29
15	AL_TA	R20_10m	R20	10	Coral reef	2	29
16	AL_TA	R20_10m	R20	10	Coral reef	2	29
17	AL_TA	R20_10m	R20	10	Coral reef	2	29
18	CO_En	R20_10m	R20	10	Coral reef	2	29
19	SP_En	R20_10m	R20	10	Coral reef	2	29
20	OT_AC	R20_10m	R20	10	Coral reef	2	29
21	SC_Xe	R20_10m	R20	10	Coral reef	2	29
22	CO_En	R20_10m	R20	10	Coral reef	2	29
23	SP_En	R20_10m	R20	10	Coral reef	2	29
24	CO_En	R20_10m	R20	10	Coral reef	2	29
25	CO_En	R20_10m	R20	10	Coral reef	2	29
1	CO_Fo	R20_10m	R20	10	Coral reef	2	3
2	CO_Fo	R20_10m	R20	10	Coral reef	2	3
3	CO_Fo	R20_10m	R20	10	Coral reef	2	3
4	CO_Fo	R20_10m	R20	10	Coral reef	2	3
5	CO_Fo	R20_10m	R20	10	Coral reef	2	3
6	CO_Fo	R20_10m	R20	10	Coral reef	2	3
7	CO_Fo	R20_10m	R20	10	Coral reef	2	3
8	CO_Fo	R20_10m	R20	10	Coral reef	2	3
9	CO_Fo	R20_10m	R20	10	Coral reef	2	3
10	CO_Fo	R20_10m	R20	10	Coral reef	2	3
11	CO_Fo	R20_10m	R20	10	Coral reef	2	3
12	CO_Fo	R20_10m	R20	10	Coral reef	2	3
13	CO_Fo	R20_10m	R20	10	Coral reef	2	3
14	CO_Fo	R20_10m	R20	10	Coral reef	2	3
15	CO_Fo	R20_10m	R20	10	Coral reef	2	3
16	CO_Fo	R20_10m	R20	10	Coral reef	2	3
17	CO_Fo	R20_10m	R20	10	Coral reef	2	3
18	CO_Fo	R20_10m	R20	10	Coral reef	2	3
19	CO_Fo	R20_10m	R20	10	Coral reef	2	3
20	CO_Fo	R20_10m	R20	10	Coral reef	2	3
21	CO_Fo	R20_10m	R20	10	Coral reef	2	3
22	CO_Fo	R20_10m	R20	10	Coral reef	2	3
23	CO_Fo	R20_10m	R20	10	Coral reef	2	3
24	CO_Fo	R20_10m	R20	10	Coral reef	2	3
25	CO_Fo	R20_10m	R20	10	Coral reef	2	3
1	SC_Xe	R20_10m	R20	10	Coral reef	2	30
2	AL_TA	R20_10m	R20	10	Coral reef	2	30
3	SU_Ru	R20_10m	R20	10	Coral reef	2	30
4	AL_TA	R20_10m	R20	10	Coral reef	2	30
5	AL_TA	R20_10m	R20	10	Coral reef	2	30
6	SU_Ru	R20_10m	R20	10	Coral reef	2	30
7	SU_Ru	R20_10m	R20	10	Coral reef	2	30
8	AL_TA	R20_10m	R20	10	Coral reef	2	30
9	AL_TA	R20_10m	R20	10	Coral reef	2	30
10	AL_TA	R20_10m	R20	10	Coral reef	2	30
11	SU_Ru	R20_10m	R20	10	Coral reef	2	30
12	SC_Xe	R20_10m	R20	10	Coral reef	2	30
13	SC_Xe	R20_10m	R20	10	Coral reef	2	30
14	AL_TA	R20_10m	R20	10	Coral reef	2	30
15	SC_Xe	R20_10m	R20	10	Coral reef	2	30
16	SC_Xe	R20_10m	R20	10	Coral reef	2	30
17	SC_Xe	R20_10m	R20	10	Coral reef	2	30
18	SC_Xe	R20_10m	R20	10	Coral reef	2	30
19	CY_RB	R20_10m	R20	10	Coral reef	2	30
20	SC_Xe	R20_10m	R20	10	Coral reef	2	30
21	SC_Xe	R20_10m	R20	10	Coral reef	2	30
22	CY_RB	R20_10m	R20	10	Coral reef	2	30
23	SU_Ru	R20_10m	R20	10	Coral reef	2	30
24	SC_Xe	R20_10m	R20	10	Coral reef	2	30
25	SC_Xe	R20_10m	R20	10	Coral reef	2	30
1	CO_Fo	R20_10m	R20	10	Coral reef	2	4
2	CO_Fo	R20_10m	R20	10	Coral reef	2	4
3	CO_Fo	R20_10m	R20	10	Coral reef	2	4
4	SC_Xe	R20_10m	R20	10	Coral reef	2	4
5	CY_RB	R20_10m	R20	10	Coral reef	2	4
6	CO_Fo	R20_10m	R20	10	Coral reef	2	4
7	SC_Xe	R20_10m	R20	10	Coral reef	2	4
8	AL_TA	R20_10m	R20	10	Coral reef	2	4
9	SC_Xe	R20_10m	R20	10	Coral reef	2	4
10	AL_TA	R20_10m	R20	10	Coral reef	2	4
11	CO_Fo	R20_10m	R20	10	Coral reef	2	4
12	CO_Fo	R20_10m	R20	10	Coral reef	2	4
13	CY_RB	R20_10m	R20	10	Coral reef	2	4
14	CO_Fo	R20_10m	R20	10	Coral reef	2	4
15	AL_TA	R20_10m	R20	10	Coral reef	2	4
16	CO_Fo	R20_10m	R20	10	Coral reef	2	4
17	CO_Fo	R20_10m	R20	10	Coral reef	2	4
18	CO_Fo	R20_10m	R20	10	Coral reef	2	4
19	SC_Xe	R20_10m	R20	10	Coral reef	2	4
20	SP_Ma	R20_10m	R20	10	Coral reef	2	4
21	SC_Xe	R20_10m	R20	10	Coral reef	2	4
22	SC_Xe	R20_10m	R20	10	Coral reef	2	4
23	SC_Xe	R20_10m	R20	10	Coral reef	2	4
24	CO_Fo	R20_10m	R20	10	Coral reef	2	4
25	AL_TA	R20_10m	R20	10	Coral reef	2	4
1	AL_TA	R20_10m	R20	10	Coral reef	2	5
2	CY_RB	R20_10m	R20	10	Coral reef	2	5
3	SC_Go	R20_10m	R20	10	Coral reef	2	5
4	SC_Go	R20_10m	R20	10	Coral reef	2	5
5	SC_Go	R20_10m	R20	10	Coral reef	2	5
6	CO_Fo	R20_10m	R20	10	Coral reef	2	5
7	AL_CA	R20_10m	R20	10	Coral reef	2	5
8	AL_CA	R20_10m	R20	10	Coral reef	2	5
9	CY_RB	R20_10m	R20	10	Coral reef	2	5
10	SC_Go	R20_10m	R20	10	Coral reef	2	5
11	CO_Br	R20_10m	R20	10	Coral reef	2	5
12	CO_Br	R20_10m	R20	10	Coral reef	2	5
13	SP_En	R20_10m	R20	10	Coral reef	2	5
14	SC_Go	R20_10m	R20	10	Coral reef	2	5
15	SC_Go	R20_10m	R20	10	Coral reef	2	5
16	CO_Fo	R20_10m	R20	10	Coral reef	2	5
17	CO_Fo	R20_10m	R20	10	Coral reef	2	5
18	CY_RB	R20_10m	R20	10	Coral reef	2	5
19	SC_Go	R20_10m	R20	10	Coral reef	2	5
20	CY_RB	R20_10m	R20	10	Coral reef	2	5
21	CO_Fo	R20_10m	R20	10	Coral reef	2	5
22	CO_Fo	R20_10m	R20	10	Coral reef	2	5
23	CY_RB	R20_10m	R20	10	Coral reef	2	5
24	CY_RB	R20_10m	R20	10	Coral reef	2	5
25	SC_Go	R20_10m	R20	10	Coral reef	2	5
1	AC_Br	R20_10m	R20	10	Coral reef	2	6
2	AC_Br	R20_10m	R20	10	Coral reef	2	6
3	AC_Br	R20_10m	R20	10	Coral reef	2	6
4	AC_Br	R20_10m	R20	10	Coral reef	2	6
5	AC_Br	R20_10m	R20	10	Coral reef	2	6
6	AC_Br	R20_10m	R20	10	Coral reef	2	6
7	AC_Br	R20_10m	R20	10	Coral reef	2	6
8	AC_Br	R20_10m	R20	10	Coral reef	2	6
9	CY_RB	R20_10m	R20	10	Coral reef	2	6
10	SC_Go	R20_10m	R20	10	Coral reef	2	6
11	CY_RB	R20_10m	R20	10	Coral reef	2	6
12	AC_Br	R20_10m	R20	10	Coral reef	2	6
13	AC_Br	R20_10m	R20	10	Coral reef	2	6
14	AC_Br	R20_10m	R20	10	Coral reef	2	6
15	CO_Br	R20_10m	R20	10	Coral reef	2	6
16	AC_Br	R20_10m	R20	10	Coral reef	2	6
17	AC_Br	R20_10m	R20	10	Coral reef	2	6
18	CO_Fo	R20_10m	R20	10	Coral reef	2	6
19	AC_Br	R20_10m	R20	10	Coral reef	2	6
20	SC_Go	R20_10m	R20	10	Coral reef	2	6
21	CO_Fo	R20_10m	R20	10	Coral reef	2	6
22	AC_Br	R20_10m	R20	10	Coral reef	2	6
23	AL_TA	R20_10m	R20	10	Coral reef	2	6
24	SC_Go	R20_10m	R20	10	Coral reef	2	6
25	SC_Go	R20_10m	R20	10	Coral reef	2	6
1	AC_Br	R20_10m	R20	10	Coral reef	2	7
2	AC_Br	R20_10m	R20	10	Coral reef	2	7
3	AC_Br	R20_10m	R20	10	Coral reef	2	7
4	AC_Br	R20_10m	R20	10	Coral reef	2	7
5	AC_Br	R20_10m	R20	10	Coral reef	2	7
6	AC_Br	R20_10m	R20	10	Coral reef	2	7
7	AC_Br	R20_10m	R20	10	Coral reef	2	7
8	AC_Br	R20_10m	R20	10	Coral reef	2	7
9	AC_Br	R20_10m	R20	10	Coral reef	2	7
10	SP_En	R20_10m	R20	10	Coral reef	2	7
11	AC_Br	R20_10m	R20	10	Coral reef	2	7
12	AC_Br	R20_10m	R20	10	Coral reef	2	7
13	AC_Br	R20_10m	R20	10	Coral reef	2	7
14	AC_Br	R20_10m	R20	10	Coral reef	2	7
15	AC_Br	R20_10m	R20	10	Coral reef	2	7
16	AC_Br	R20_10m	R20	10	Coral reef	2	7
17	AC_Br	R20_10m	R20	10	Coral reef	2	7
18	AC_Br	R20_10m	R20	10	Coral reef	2	7
19	AC_Br	R20_10m	R20	10	Coral reef	2	7
20	AC_Br	R20_10m	R20	10	Coral reef	2	7
21	AC_Br	R20_10m	R20	10	Coral reef	2	7
22	AC_Br	R20_10m	R20	10	Coral reef	2	7
23	CO_Fo	R20_10m	R20	10	Coral reef	2	7
24	OT_AC	R20_10m	R20	10	Coral reef	2	7
25	AC_Br	R20_10m	R20	10	Coral reef	2	7
1	CO_Br	R20_10m	R20	10	Coral reef	2	8
2	CY_RB	R20_10m	R20	10	Coral reef	2	8
3	SC_OT	R20_10m	R20	10	Coral reef	2	8
4	SC_OT	R20_10m	R20	10	Coral reef	2	8
5	CY_RB	R20_10m	R20	10	Coral reef	2	8
6	CO_Br	R20_10m	R20	10	Coral reef	2	8
7	CO_Br	R20_10m	R20	10	Coral reef	2	8
8	CY_RB	R20_10m	R20	10	Coral reef	2	8
9	CY_RB	R20_10m	R20	10	Coral reef	2	8
10	CY_RB	R20_10m	R20	10	Coral reef	2	8
11	CO_Br	R20_10m	R20	10	Coral reef	2	8
12	CY_RB	R20_10m	R20	10	Coral reef	2	8
13	CY_RB	R20_10m	R20	10	Coral reef	2	8
14	CY_RB	R20_10m	R20	10	Coral reef	2	8
15	CY_RB	R20_10m	R20	10	Coral reef	2	8
16	AC_Br	R20_10m	R20	10	Coral reef	2	8
17	AC_Br	R20_10m	R20	10	Coral reef	2	8
18	AC_Br	R20_10m	R20	10	Coral reef	2	8
19	CY_RB	R20_10m	R20	10	Coral reef	2	8
20	CY_RB	R20_10m	R20	10	Coral reef	2	8
21	AC_Br	R20_10m	R20	10	Coral reef	2	8
22	AC_Br	R20_10m	R20	10	Coral reef	2	8
23	AC_Br	R20_10m	R20	10	Coral reef	2	8
24	SP_En	R20_10m	R20	10	Coral reef	2	8
25	AC_Br	R20_10m	R20	10	Coral reef	2	8
1	CO_Fo	R20_10m	R20	10	Coral reef	2	9
2	CO_Fo	R20_10m	R20	10	Coral reef	2	9
3	CO_Fo	R20_10m	R20	10	Coral reef	2	9
4	CO_Fo	R20_10m	R20	10	Coral reef	2	9
5	CO_Fo	R20_10m	R20	10	Coral reef	2	9
6	CO_Fo	R20_10m	R20	10	Coral reef	2	9
7	CO_Fo	R20_10m	R20	10	Coral reef	2	9
8	CO_Fo	R20_10m	R20	10	Coral reef	2	9
9	CO_Fo	R20_10m	R20	10	Coral reef	2	9
10	CO_Fo	R20_10m	R20	10	Coral reef	2	9
11	CO_Fo	R20_10m	R20	10	Coral reef	2	9
12	CO_Fo	R20_10m	R20	10	Coral reef	2	9
13	CO_Fo	R20_10m	R20	10	Coral reef	2	9
14	CO_Fo	R20_10m	R20	10	Coral reef	2	9
15	CO_Fo	R20_10m	R20	10	Coral reef	2	9
16	CY_RB	R20_10m	R20	10	Coral reef	2	9
17	CO_Br	R20_10m	R20	10	Coral reef	2	9
18	CO_Fo	R20_10m	R20	10	Coral reef	2	9
19	CO_Fo	R20_10m	R20	10	Coral reef	2	9
20	CO_Fo	R20_10m	R20	10	Coral reef	2	9
21	CY_RB	R20_10m	R20	10	Coral reef	2	9
22	CY_RB	R20_10m	R20	10	Coral reef	2	9
23	SC_OT	R20_10m	R20	10	Coral reef	2	9
24	SC_OT	R20_10m	R20	10	Coral reef	2	9
25	CO_Ma	R20_10m	R20	10	Coral reef	2	9
1	CY_RB	R20_10m	R20	10	Coral reef	3	1
2	AL_CA	R20_10m	R20	10	Coral reef	3	1
3	CO_Fo	R20_10m	R20	10	Coral reef	3	1
4	CO_Fo	R20_10m	R20	10	Coral reef	3	1
5	AL_TA	R20_10m	R20	10	Coral reef	3	1
6	AL_TA	R20_10m	R20	10	Coral reef	3	1
7	AL_TA	R20_10m	R20	10	Coral reef	3	1
8	CO_Fo	R20_10m	R20	10	Coral reef	3	1
9	AL_TA	R20_10m	R20	10	Coral reef	3	1
10	CO_Fo	R20_10m	R20	10	Coral reef	3	1
11	CO_Fo	R20_10m	R20	10	Coral reef	3	1
12	CO_Fo	R20_10m	R20	10	Coral reef	3	1
13	CO_Fo	R20_10m	R20	10	Coral reef	3	1
14	CO_Fo	R20_10m	R20	10	Coral reef	3	1
15	CO_Fo	R20_10m	R20	10	Coral reef	3	1
16	CO_Fo	R20_10m	R20	10	Coral reef	3	1
17	CO_Fo	R20_10m	R20	10	Coral reef	3	1
18	CO_Fo	R20_10m	R20	10	Coral reef	3	1
19	CO_Fo	R20_10m	R20	10	Coral reef	3	1
20	CO_Fo	R20_10m	R20	10	Coral reef	3	1
21	CO_Fo	R20_10m	R20	10	Coral reef	3	1
22	CO_Fo	R20_10m	R20	10	Coral reef	3	1
23	CO_Fo	R20_10m	R20	10	Coral reef	3	1
24	CO_Fo	R20_10m	R20	10	Coral reef	3	1
25	CO_Fo	R20_10m	R20	10	Coral reef	3	1
1	CO_Fo	R20_10m	R20	10	Coral reef	3	10
2	AC_Br	R20_10m	R20	10	Coral reef	3	10
3	AC_Br	R20_10m	R20	10	Coral reef	3	10
4	AC_Br	R20_10m	R20	10	Coral reef	3	10
5	AC_Br	R20_10m	R20	10	Coral reef	3	10
6	CO_Ma	R20_10m	R20	10	Coral reef	3	10
7	AC_Br	R20_10m	R20	10	Coral reef	3	10
8	SP_En	R20_10m	R20	10	Coral reef	3	10
9	CO_Fo	R20_10m	R20	10	Coral reef	3	10
10	AC_Br	R20_10m	R20	10	Coral reef	3	10
11	CO_Br	R20_10m	R20	10	Coral reef	3	10
12	AC_Br	R20_10m	R20	10	Coral reef	3	10
13	AC_Br	R20_10m	R20	10	Coral reef	3	10
14	AC_Br	R20_10m	R20	10	Coral reef	3	10
15	AC_Br	R20_10m	R20	10	Coral reef	3	10
16	CO_Br	R20_10m	R20	10	Coral reef	3	10
17	CO_Br	R20_10m	R20	10	Coral reef	3	10
18	AC_Br	R20_10m	R20	10	Coral reef	3	10
19	AC_Br	R20_10m	R20	10	Coral reef	3	10
20	AC_Br	R20_10m	R20	10	Coral reef	3	10
21	CO_Br	R20_10m	R20	10	Coral reef	3	10
22	AC_Br	R20_10m	R20	10	Coral reef	3	10
23	AC_Br	R20_10m	R20	10	Coral reef	3	10
24	AC_Br	R20_10m	R20	10	Coral reef	3	10
25	AC_Br	R20_10m	R20	10	Coral reef	3	10
1	AC_Br	R20_10m	R20	10	Coral reef	3	11
2	AC_Br	R20_10m	R20	10	Coral reef	3	11
3	AC_Br	R20_10m	R20	10	Coral reef	3	11
4	AC_Br	R20_10m	R20	10	Coral reef	3	11
5	AC_Br	R20_10m	R20	10	Coral reef	3	11
6	AC_Br	R20_10m	R20	10	Coral reef	3	11
7	AC_Br	R20_10m	R20	10	Coral reef	3	11
8	AC_Br	R20_10m	R20	10	Coral reef	3	11
9	AC_Br	R20_10m	R20	10	Coral reef	3	11
10	AC_Br	R20_10m	R20	10	Coral reef	3	11
11	AC_Br	R20_10m	R20	10	Coral reef	3	11
12	AC_Br	R20_10m	R20	10	Coral reef	3	11
13	CO_Fo	R20_10m	R20	10	Coral reef	3	11
14	CO_Fo	R20_10m	R20	10	Coral reef	3	11
15	CO_Fo	R20_10m	R20	10	Coral reef	3	11
16	AC_Br	R20_10m	R20	10	Coral reef	3	11
17	AC_Br	R20_10m	R20	10	Coral reef	3	11
18	AC_Br	R20_10m	R20	10	Coral reef	3	11
19	AC_Br	R20_10m	R20	10	Coral reef	3	11
20	AC_Br	R20_10m	R20	10	Coral reef	3	11
21	AC_Br	R20_10m	R20	10	Coral reef	3	11
22	AC_Br	R20_10m	R20	10	Coral reef	3	11
23	AC_Br	R20_10m	R20	10	Coral reef	3	11
24	AC_Br	R20_10m	R20	10	Coral reef	3	11
25	CO_Fo	R20_10m	R20	10	Coral reef	3	11
1	AC_Br	R20_10m	R20	10	Coral reef	3	12
2	AC_Br	R20_10m	R20	10	Coral reef	3	12
3	AC_Br	R20_10m	R20	10	Coral reef	3	12
4	AC_Br	R20_10m	R20	10	Coral reef	3	12
5	CO_Fo	R20_10m	R20	10	Coral reef	3	12
6	AC_Br	R20_10m	R20	10	Coral reef	3	12
7	AC_Br	R20_10m	R20	10	Coral reef	3	12
8	AC_Br	R20_10m	R20	10	Coral reef	3	12
9	AC_Br	R20_10m	R20	10	Coral reef	3	12
10	AC_Br	R20_10m	R20	10	Coral reef	3	12
11	AC_Br	R20_10m	R20	10	Coral reef	3	12
12	AC_Br	R20_10m	R20	10	Coral reef	3	12
13	AC_Br	R20_10m	R20	10	Coral reef	3	12
14	AC_Br	R20_10m	R20	10	Coral reef	3	12
15	AC_Br	R20_10m	R20	10	Coral reef	3	12
16	AC_Br	R20_10m	R20	10	Coral reef	3	12
17	AC_Br	R20_10m	R20	10	Coral reef	3	12
18	AC_Br	R20_10m	R20	10	Coral reef	3	12
19	AC_Br	R20_10m	R20	10	Coral reef	3	12
20	AC_Br	R20_10m	R20	10	Coral reef	3	12
21	AC_Br	R20_10m	R20	10	Coral reef	3	12
22	AC_Br	R20_10m	R20	10	Coral reef	3	12
23	AC_Br	R20_10m	R20	10	Coral reef	3	12
24	AC_Br	R20_10m	R20	10	Coral reef	3	12
25	SP_En	R20_10m	R20	10	Coral reef	3	12
1	OT_EC	R20_10m	R20	10	Coral reef	3	13
2	OT_EC	R20_10m	R20	10	Coral reef	3	13
3	CY_RB	R20_10m	R20	10	Coral reef	3	13
4	CY_RB	R20_10m	R20	10	Coral reef	3	13
5	CY_RB	R20_10m	R20	10	Coral reef	3	13
6	CY_RB	R20_10m	R20	10	Coral reef	3	13
7	CY_RB	R20_10m	R20	10	Coral reef	3	13
8	CY_RB	R20_10m	R20	10	Coral reef	3	13
9	SP_Tu	R20_10m	R20	10	Coral reef	3	13
10	SC_OT	R20_10m	R20	10	Coral reef	3	13
11	AC_Br	R20_10m	R20	10	Coral reef	3	13
12	AL_TA	R20_10m	R20	10	Coral reef	3	13
13	CY_RB	R20_10m	R20	10	Coral reef	3	13
14	CY_RB	R20_10m	R20	10	Coral reef	3	13
15	AC_Br	R20_10m	R20	10	Coral reef	3	13
16	AC_Br	R20_10m	R20	10	Coral reef	3	13
17	AC_Br	R20_10m	R20	10	Coral reef	3	13
18	AC_Br	R20_10m	R20	10	Coral reef	3	13
19	CY_RB	R20_10m	R20	10	Coral reef	3	13
20	AC_Br	R20_10m	R20	10	Coral reef	3	13
21	CY_RB	R20_10m	R20	10	Coral reef	3	13
22	CY_RB	R20_10m	R20	10	Coral reef	3	13
23	AC_Br	R20_10m	R20	10	Coral reef	3	13
24	CY_RB	R20_10m	R20	10	Coral reef	3	13
25	AL_TA	R20_10m	R20	10	Coral reef	3	13
1	AC_Br	R20_10m	R20	10	Coral reef	3	14
2	CO_Ma	R20_10m	R20	10	Coral reef	3	14
3	CO_Ma	R20_10m	R20	10	Coral reef	3	14
4	AL_TA	R20_10m	R20	10	Coral reef	3	14
5	SU_Sa	R20_10m	R20	10	Coral reef	3	14
6	AC_Br	R20_10m	R20	10	Coral reef	3	14
7	AC_Br	R20_10m	R20	10	Coral reef	3	14
8	AL_TA	R20_10m	R20	10	Coral reef	3	14
9	AL_TA	R20_10m	R20	10	Coral reef	3	14
10	AL_TA	R20_10m	R20	10	Coral reef	3	14
11	AC_Br	R20_10m	R20	10	Coral reef	3	14
12	AC_Br	R20_10m	R20	10	Coral reef	3	14
13	SC_OT	R20_10m	R20	10	Coral reef	3	14
14	AL_TA	R20_10m	R20	10	Coral reef	3	14
15	CO_Mu	R20_10m	R20	10	Coral reef	3	14
16	CY_RB	R20_10m	R20	10	Coral reef	3	14
17	AC_Br	R20_10m	R20	10	Coral reef	3	14
18	AL_TA	R20_10m	R20	10	Coral reef	3	14
19	CY_RB	R20_10m	R20	10	Coral reef	3	14
20	CY_RB	R20_10m	R20	10	Coral reef	3	14
21	AC_Br	R20_10m	R20	10	Coral reef	3	14
22	AC_Br	R20_10m	R20	10	Coral reef	3	14
23	AC_Br	R20_10m	R20	10	Coral reef	3	14
24	CY_RB	R20_10m	R20	10	Coral reef	3	14
25	CY_RB	R20_10m	R20	10	Coral reef	3	14
1	AL_TA	R20_10m	R20	10	Coral reef	3	15
2	CY_RB	R20_10m	R20	10	Coral reef	3	15
3	AL_TA	R20_10m	R20	10	Coral reef	3	15
4	CY_RB	R20_10m	R20	10	Coral reef	3	15
5	AL_TA	R20_10m	R20	10	Coral reef	3	15
6	SP_Ma	R20_10m	R20	10	Coral reef	3	15
7	SC_Go	R20_10m	R20	10	Coral reef	3	15
8	AL_TA	R20_10m	R20	10	Coral reef	3	15
9	AL_TA	R20_10m	R20	10	Coral reef	3	15
10	AL_TA	R20_10m	R20	10	Coral reef	3	15
11	SC_OT	R20_10m	R20	10	Coral reef	3	15
12	CO_Ma	R20_10m	R20	10	Coral reef	3	15
13	SC_Go	R20_10m	R20	10	Coral reef	3	15
14	SC_Go	R20_10m	R20	10	Coral reef	3	15
15	CY_RB	R20_10m	R20	10	Coral reef	3	15
16	SC_OT	R20_10m	R20	10	Coral reef	3	15
17	OT_HY	R20_10m	R20	10	Coral reef	3	15
18	CO_Ma	R20_10m	R20	10	Coral reef	3	15
19	SC_Go	R20_10m	R20	10	Coral reef	3	15
20	CY_RB	R20_10m	R20	10	Coral reef	3	15
21	AC_Br	R20_10m	R20	10	Coral reef	3	15
22	CO_Ma	R20_10m	R20	10	Coral reef	3	15
23	CO_Ma	R20_10m	R20	10	Coral reef	3	15
24	CO_Ma	R20_10m	R20	10	Coral reef	3	15
25	AL_TA	R20_10m	R20	10	Coral reef	3	15
1	SC_Go	R20_10m	R20	10	Coral reef	3	16
2	SC_Go	R20_10m	R20	10	Coral reef	3	16
3	SC_Go	R20_10m	R20	10	Coral reef	3	16
4	SC_Go	R20_10m	R20	10	Coral reef	3	16
5	CY_RB	R20_10m	R20	10	Coral reef	3	16
6	CY_RB	R20_10m	R20	10	Coral reef	3	16
7	AL_TA	R20_10m	R20	10	Coral reef	3	16
8	CY_RB	R20_10m	R20	10	Coral reef	3	16
9	SP_Ma	R20_10m	R20	10	Coral reef	3	16
10	AL_TA	R20_10m	R20	10	Coral reef	3	16
11	AL_TA	R20_10m	R20	10	Coral reef	3	16
12	SC_Go	R20_10m	R20	10	Coral reef	3	16
13	AL_CA	R20_10m	R20	10	Coral reef	3	16
14	CY_RB	R20_10m	R20	10	Coral reef	3	16
15	CY_RB	R20_10m	R20	10	Coral reef	3	16
16	SC_Go	R20_10m	R20	10	Coral reef	3	16
17	CY_RB	R20_10m	R20	10	Coral reef	3	16
18	AL_TA	R20_10m	R20	10	Coral reef	3	16
19	AL_TA	R20_10m	R20	10	Coral reef	3	16
20	CY_RB	R20_10m	R20	10	Coral reef	3	16
21	CO_Ma	R20_10m	R20	10	Coral reef	3	16
22	SC_Go	R20_10m	R20	10	Coral reef	3	16
23	SC_Go	R20_10m	R20	10	Coral reef	3	16
24	CY_RB	R20_10m	R20	10	Coral reef	3	16
25	CY_RB	R20_10m	R20	10	Coral reef	3	16
1	CY_RB	R20_10m	R20	10	Coral reef	3	17
2	SC_Go	R20_10m	R20	10	Coral reef	3	17
3	CO_Ma	R20_10m	R20	10	Coral reef	3	17
4	CO_Ma	R20_10m	R20	10	Coral reef	3	17
5	CO_Ma	R20_10m	R20	10	Coral reef	3	17
6	AL_TA	R20_10m	R20	10	Coral reef	3	17
7	AL_TA	R20_10m	R20	10	Coral reef	3	17
8	CO_Ma	R20_10m	R20	10	Coral reef	3	17
9	CO_Ma	R20_10m	R20	10	Coral reef	3	17
10	CO_Ma	R20_10m	R20	10	Coral reef	3	17
11	AL_TA	R20_10m	R20	10	Coral reef	3	17
12	AL_CA	R20_10m	R20	10	Coral reef	3	17
13	CO_Ma	R20_10m	R20	10	Coral reef	3	17
14	CO_Ma	R20_10m	R20	10	Coral reef	3	17
15	CO_Ma	R20_10m	R20	10	Coral reef	3	17
16	CO_Ma	R20_10m	R20	10	Coral reef	3	17
17	CO_Ma	R20_10m	R20	10	Coral reef	3	17
18	AL_TA	R20_10m	R20	10	Coral reef	3	17
19	SC_OT	R20_10m	R20	10	Coral reef	3	17
20	SC_OT	R20_10m	R20	10	Coral reef	3	17
21	CO_Ma	R20_10m	R20	10	Coral reef	3	17
22	CO_Ma	R20_10m	R20	10	Coral reef	3	17
23	CO_Ma	R20_10m	R20	10	Coral reef	3	17
24	AL_TA	R20_10m	R20	10	Coral reef	3	17
25	CY_RB	R20_10m	R20	10	Coral reef	3	17
1	AL_CA	R20_10m	R20	10	Coral reef	3	18
2	CO_En	R20_10m	R20	10	Coral reef	3	18
3	CO_En	R20_10m	R20	10	Coral reef	3	18
4	CO_En	R20_10m	R20	10	Coral reef	3	18
5	CO_En	R20_10m	R20	10	Coral reef	3	18
6	OT_AC	R20_10m	R20	10	Coral reef	3	18
7	AL_TA	R20_10m	R20	10	Coral reef	3	18
8	CO_En	R20_10m	R20	10	Coral reef	3	18
9	CO_En	R20_10m	R20	10	Coral reef	3	18
10	CO_En	R20_10m	R20	10	Coral reef	3	18
11	CO_En	R20_10m	R20	10	Coral reef	3	18
12	CO_En	R20_10m	R20	10	Coral reef	3	18
13	CO_En	R20_10m	R20	10	Coral reef	3	18
14	CO_En	R20_10m	R20	10	Coral reef	3	18
15	AL_TA	R20_10m	R20	10	Coral reef	3	18
16	SC_Go	R20_10m	R20	10	Coral reef	3	18
17	CO_En	R20_10m	R20	10	Coral reef	3	18
18	CO_En	R20_10m	R20	10	Coral reef	3	18
19	SP_En	R20_10m	R20	10	Coral reef	3	18
20	CO_Br	R20_10m	R20	10	Coral reef	3	18
21	AL_TA	R20_10m	R20	10	Coral reef	3	18
22	CO_En	R20_10m	R20	10	Coral reef	3	18
23	CO_En	R20_10m	R20	10	Coral reef	3	18
24	CO_Br	R20_10m	R20	10	Coral reef	3	18
25	CO_Br	R20_10m	R20	10	Coral reef	3	18
1	SC_Go	R20_10m	R20	10	Coral reef	3	19
2	AL_TA	R20_10m	R20	10	Coral reef	3	19
3	AL_TA	R20_10m	R20	10	Coral reef	3	19
4	SC_Go	R20_10m	R20	10	Coral reef	3	19
5	OT_AC	R20_10m	R20	10	Coral reef	3	19
6	AL_TA	R20_10m	R20	10	Coral reef	3	19
7	AL_TA	R20_10m	R20	10	Coral reef	3	19
8	AL_TA	R20_10m	R20	10	Coral reef	3	19
9	AL_TA	R20_10m	R20	10	Coral reef	3	19
10	SC_Go	R20_10m	R20	10	Coral reef	3	19
11	AL_TA	R20_10m	R20	10	Coral reef	3	19
12	SC_Go	R20_10m	R20	10	Coral reef	3	19
13	SC_Go	R20_10m	R20	10	Coral reef	3	19
14	AL_TA	R20_10m	R20	10	Coral reef	3	19
15	CY_RB	R20_10m	R20	10	Coral reef	3	19
16	AL_TA	R20_10m	R20	10	Coral reef	3	19
17	AL_TA	R20_10m	R20	10	Coral reef	3	19
18	SC_Go	R20_10m	R20	10	Coral reef	3	19
19	AL_TA	R20_10m	R20	10	Coral reef	3	19
20	AL_TA	R20_10m	R20	10	Coral reef	3	19
21	AL_TA	R20_10m	R20	10	Coral reef	3	19
22	CY_RB	R20_10m	R20	10	Coral reef	3	19
23	CY_RB	R20_10m	R20	10	Coral reef	3	19
24	CO_En	R20_10m	R20	10	Coral reef	3	19
25	SC_Go	R20_10m	R20	10	Coral reef	3	19
1	AL_TA	R20_10m	R20	10	Coral reef	3	2
2	SC_OT	R20_10m	R20	10	Coral reef	3	2
3	SC_OT	R20_10m	R20	10	Coral reef	3	2
4	SC_OT	R20_10m	R20	10	Coral reef	3	2
5	SC_OT	R20_10m	R20	10	Coral reef	3	2
6	AL_TA	R20_10m	R20	10	Coral reef	3	2
7	CO_Br	R20_10m	R20	10	Coral reef	3	2
8	SC_OT	R20_10m	R20	10	Coral reef	3	2
9	SC_OT	R20_10m	R20	10	Coral reef	3	2
10	SC_OT	R20_10m	R20	10	Coral reef	3	2
11	AL_TA	R20_10m	R20	10	Coral reef	3	2
12	CO_Br	R20_10m	R20	10	Coral reef	3	2
13	CO_Br	R20_10m	R20	10	Coral reef	3	2
14	SC_OT	R20_10m	R20	10	Coral reef	3	2
15	SC_OT	R20_10m	R20	10	Coral reef	3	2
16	CO_Br	R20_10m	R20	10	Coral reef	3	2
17	CO_Br	R20_10m	R20	10	Coral reef	3	2
18	CO_Br	R20_10m	R20	10	Coral reef	3	2
19	CO_Br	R20_10m	R20	10	Coral reef	3	2
20	CO_Fo	R20_10m	R20	10	Coral reef	3	2
21	CO_Br	R20_10m	R20	10	Coral reef	3	2
22	CO_Br	R20_10m	R20	10	Coral reef	3	2
23	CO_Br	R20_10m	R20	10	Coral reef	3	2
24	CO_Br	R20_10m	R20	10	Coral reef	3	2
25	CO_Fo	R20_10m	R20	10	Coral reef	3	2
1	SP_En	R20_10m	R20	10	Coral reef	3	20
2	SP_En	R20_10m	R20	10	Coral reef	3	20
3	SP_En	R20_10m	R20	10	Coral reef	3	20
4	CY_RB	R20_10m	R20	10	Coral reef	3	20
5	SU_Ru	R20_10m	R20	10	Coral reef	3	20
6	OT_HY	R20_10m	R20	10	Coral reef	3	20
7	OT_HY	R20_10m	R20	10	Coral reef	3	20
8	AC_Br	R20_10m	R20	10	Coral reef	3	20
9	CY_RB	R20_10m	R20	10	Coral reef	3	20
10	AL_TA	R20_10m	R20	10	Coral reef	3	20
11	OT_HY	R20_10m	R20	10	Coral reef	3	20
12	CY_RB	R20_10m	R20	10	Coral reef	3	20
13	SP_En	R20_10m	R20	10	Coral reef	3	20
14	SP_En	R20_10m	R20	10	Coral reef	3	20
15	CO_Br	R20_10m	R20	10	Coral reef	3	20
16	CY_RB	R20_10m	R20	10	Coral reef	3	20
17	CO_En	R20_10m	R20	10	Coral reef	3	20
18	OT_AC	R20_10m	R20	10	Coral reef	3	20
19	SP_En	R20_10m	R20	10	Coral reef	3	20
20	SP_En	R20_10m	R20	10	Coral reef	3	20
21	AL_TA	R20_10m	R20	10	Coral reef	3	20
22	AL_TA	R20_10m	R20	10	Coral reef	3	20
23	CY_RB	R20_10m	R20	10	Coral reef	3	20
24	SC_Go	R20_10m	R20	10	Coral reef	3	20
25	SC_Go	R20_10m	R20	10	Coral reef	3	20
1	AC_Tb	R20_10m	R20	10	Coral reef	3	21
2	OT_EC	R20_10m	R20	10	Coral reef	3	21
3	AL_TA	R20_10m	R20	10	Coral reef	3	21
4	AL_TA	R20_10m	R20	10	Coral reef	3	21
5	CY_RB	R20_10m	R20	10	Coral reef	3	21
6	CY_RB	R20_10m	R20	10	Coral reef	3	21
7	CY_RB	R20_10m	R20	10	Coral reef	3	21
8	SC_OT	R20_10m	R20	10	Coral reef	3	21
9	AL_TA	R20_10m	R20	10	Coral reef	3	21
10	AL_TA	R20_10m	R20	10	Coral reef	3	21
11	CY_RB	R20_10m	R20	10	Coral reef	3	21
12	CY_RB	R20_10m	R20	10	Coral reef	3	21
13	CY_RB	R20_10m	R20	10	Coral reef	3	21
14	CY_RB	R20_10m	R20	10	Coral reef	3	21
15	AL_TA	R20_10m	R20	10	Coral reef	3	21
16	CY_RB	R20_10m	R20	10	Coral reef	3	21
17	CY_RB	R20_10m	R20	10	Coral reef	3	21
18	CY_RB	R20_10m	R20	10	Coral reef	3	21
19	SP_En	R20_10m	R20	10	Coral reef	3	21
20	OT_AC	R20_10m	R20	10	Coral reef	3	21
21	CY_RB	R20_10m	R20	10	Coral reef	3	21
22	CY_RB	R20_10m	R20	10	Coral reef	3	21
23	CY_RB	R20_10m	R20	10	Coral reef	3	21
24	AC_Tb	R20_10m	R20	10	Coral reef	3	21
25	CY_RB	R20_10m	R20	10	Coral reef	3	21
1	AC_Br	R20_10m	R20	10	Coral reef	3	22
2	AC_Br	R20_10m	R20	10	Coral reef	3	22
3	AC_Br	R20_10m	R20	10	Coral reef	3	22
4	CO_Ma	R20_10m	R20	10	Coral reef	3	22
5	AC_Br	R20_10m	R20	10	Coral reef	3	22
6	AC_Br	R20_10m	R20	10	Coral reef	3	22
7	CY_RB	R20_10m	R20	10	Coral reef	3	22
8	CY_RB	R20_10m	R20	10	Coral reef	3	22
9	AL_TA	R20_10m	R20	10	Coral reef	3	22
10	SC_Xe	R20_10m	R20	10	Coral reef	3	22
11	AC_Br	R20_10m	R20	10	Coral reef	3	22
12	AC_Br	R20_10m	R20	10	Coral reef	3	22
13	CY_RB	R20_10m	R20	10	Coral reef	3	22
14	CY_RB	R20_10m	R20	10	Coral reef	3	22
15	AL_TA	R20_10m	R20	10	Coral reef	3	22
16	AL_TA	R20_10m	R20	10	Coral reef	3	22
17	CY_RB	R20_10m	R20	10	Coral reef	3	22
18	CY_RB	R20_10m	R20	10	Coral reef	3	22
19	CY_RB	R20_10m	R20	10	Coral reef	3	22
20	AL_TA	R20_10m	R20	10	Coral reef	3	22
21	AL_TA	R20_10m	R20	10	Coral reef	3	22
22	CY_RB	R20_10m	R20	10	Coral reef	3	22
23	CO_Fo	R20_10m	R20	10	Coral reef	3	22
24	AL_TA	R20_10m	R20	10	Coral reef	3	22
25	SP_En	R20_10m	R20	10	Coral reef	3	22
1	SP_En	R20_10m	R20	10	Coral reef	3	23
2	OT_AC	R20_10m	R20	10	Coral reef	3	23
3	OT_AC	R20_10m	R20	10	Coral reef	3	23
4	AC_Br	R20_10m	R20	10	Coral reef	3	23
5	AC_Br	R20_10m	R20	10	Coral reef	3	23
6	AC_Br	R20_10m	R20	10	Coral reef	3	23
7	AC_Br	R20_10m	R20	10	Coral reef	3	23
8	AL_TA	R20_10m	R20	10	Coral reef	3	23
9	AC_Br	R20_10m	R20	10	Coral reef	3	23
10	AL_TA	R20_10m	R20	10	Coral reef	3	23
11	AC_Br	R20_10m	R20	10	Coral reef	3	23
12	AC_Br	R20_10m	R20	10	Coral reef	3	23
13	AC_Br	R20_10m	R20	10	Coral reef	3	23
14	OT_AC	R20_10m	R20	10	Coral reef	3	23
15	AC_Br	R20_10m	R20	10	Coral reef	3	23
16	AC_Br	R20_10m	R20	10	Coral reef	3	23
17	AC_Br	R20_10m	R20	10	Coral reef	3	23
18	AC_Br	R20_10m	R20	10	Coral reef	3	23
19	AC_Br	R20_10m	R20	10	Coral reef	3	23
20	AC_Br	R20_10m	R20	10	Coral reef	3	23
21	AC_Br	R20_10m	R20	10	Coral reef	3	23
22	AC_Br	R20_10m	R20	10	Coral reef	3	23
23	AC_Br	R20_10m	R20	10	Coral reef	3	23
24	AC_Br	R20_10m	R20	10	Coral reef	3	23
25	CY_RB	R20_10m	R20	10	Coral reef	3	23
1	CY_RB	R20_10m	R20	10	Coral reef	3	24
2	SU_Ru	R20_10m	R20	10	Coral reef	3	24
3	SU_Ru	R20_10m	R20	10	Coral reef	3	24
4	SU_Ru	R20_10m	R20	10	Coral reef	3	24
5	CY_RB	R20_10m	R20	10	Coral reef	3	24
6	AL_TA	R20_10m	R20	10	Coral reef	3	24
7	CY_RB	R20_10m	R20	10	Coral reef	3	24
8	CY_RB	R20_10m	R20	10	Coral reef	3	24
9	CY_RB	R20_10m	R20	10	Coral reef	3	24
10	CY_RB	R20_10m	R20	10	Coral reef	3	24
11	CY_RB	R20_10m	R20	10	Coral reef	3	24
12	AL_TA	R20_10m	R20	10	Coral reef	3	24
13	CY_RB	R20_10m	R20	10	Coral reef	3	24
14	OT_AC	R20_10m	R20	10	Coral reef	3	24
15	AL_TA	R20_10m	R20	10	Coral reef	3	24
16	CY_RB	R20_10m	R20	10	Coral reef	3	24
17	CO_Tu	R20_10m	R20	10	Coral reef	3	24
18	CY_RB	R20_10m	R20	10	Coral reef	3	24
19	CO_Fo	R20_10m	R20	10	Coral reef	3	24
20	AL_TA	R20_10m	R20	10	Coral reef	3	24
21	OT_AC	R20_10m	R20	10	Coral reef	3	24
22	CY_RB	R20_10m	R20	10	Coral reef	3	24
23	AL_TA	R20_10m	R20	10	Coral reef	3	24
24	CY_RB	R20_10m	R20	10	Coral reef	3	24
25	CY_RB	R20_10m	R20	10	Coral reef	3	24
1	AL_TA	R20_10m	R20	10	Coral reef	3	25
2	SU_Ru	R20_10m	R20	10	Coral reef	3	25
3	SU_Ru	R20_10m	R20	10	Coral reef	3	25
4	SC_Xe	R20_10m	R20	10	Coral reef	3	25
5	SC_Xe	R20_10m	R20	10	Coral reef	3	25
6	AL_TA	R20_10m	R20	10	Coral reef	3	25
7	AL_TA	R20_10m	R20	10	Coral reef	3	25
8	SU_Ru	R20_10m	R20	10	Coral reef	3	25
9	SU_Ru	R20_10m	R20	10	Coral reef	3	25
10	AL_TA	R20_10m	R20	10	Coral reef	3	25
11	AL_TA	R20_10m	R20	10	Coral reef	3	25
12	AL_TA	R20_10m	R20	10	Coral reef	3	25
13	SU_Ru	R20_10m	R20	10	Coral reef	3	25
14	CO_En	R20_10m	R20	10	Coral reef	3	25
15	AL_TA	R20_10m	R20	10	Coral reef	3	25
16	CY_RB	R20_10m	R20	10	Coral reef	3	25
17	AL_TA	R20_10m	R20	10	Coral reef	3	25
18	SU_Ru	R20_10m	R20	10	Coral reef	3	25
19	SU_Ru	R20_10m	R20	10	Coral reef	3	25
20	SU_Ru	R20_10m	R20	10	Coral reef	3	25
21	AL_TA	R20_10m	R20	10	Coral reef	3	25
22	AL_TA	R20_10m	R20	10	Coral reef	3	25
23	AL_TA	R20_10m	R20	10	Coral reef	3	25
24	CO_Me	R20_10m	R20	10	Coral reef	3	25
25	SU_Ru	R20_10m	R20	10	Coral reef	3	25
1	CY_RB	R20_10m	R20	10	Coral reef	3	26
2	SU_Ru	R20_10m	R20	10	Coral reef	3	26
3	CY_RB	R20_10m	R20	10	Coral reef	3	26
4	AL_TA	R20_10m	R20	10	Coral reef	3	26
5	SU_Sa	R20_10m	R20	10	Coral reef	3	26
6	SP_En	R20_10m	R20	10	Coral reef	3	26
7	CY_RB	R20_10m	R20	10	Coral reef	3	26
8	CO_Mu	R20_10m	R20	10	Coral reef	3	26
9	SC_Xe	R20_10m	R20	10	Coral reef	3	26
10	SC_Xe	R20_10m	R20	10	Coral reef	3	26
11	CY_RB	R20_10m	R20	10	Coral reef	3	26
12	SU_Ru	R20_10m	R20	10	Coral reef	3	26
13	SU_Ru	R20_10m	R20	10	Coral reef	3	26
14	SU_Ru	R20_10m	R20	10	Coral reef	3	26
15	AL_TA	R20_10m	R20	10	Coral reef	3	26
16	CY_RB	R20_10m	R20	10	Coral reef	3	26
17	CY_RB	R20_10m	R20	10	Coral reef	3	26
18	CY_RB	R20_10m	R20	10	Coral reef	3	26
19	SU_Ru	R20_10m	R20	10	Coral reef	3	26
20	AL_TA	R20_10m	R20	10	Coral reef	3	26
21	CO_Fo	R20_10m	R20	10	Coral reef	3	26
22	CY_RB	R20_10m	R20	10	Coral reef	3	26
23	CY_RB	R20_10m	R20	10	Coral reef	3	26
24	CO_En	R20_10m	R20	10	Coral reef	3	26
25	CY_RB	R20_10m	R20	10	Coral reef	3	26
1	CY_RB	R20_10m	R20	10	Coral reef	3	27
2	CY_RB	R20_10m	R20	10	Coral reef	3	27
3	AL_TA	R20_10m	R20	10	Coral reef	3	27
4	SP_En	R20_10m	R20	10	Coral reef	3	27
5	SP_En	R20_10m	R20	10	Coral reef	3	27
6	AL_TA	R20_10m	R20	10	Coral reef	3	27
7	AL_TA	R20_10m	R20	10	Coral reef	3	27
8	AL_TA	R20_10m	R20	10	Coral reef	3	27
9	AL_TA	R20_10m	R20	10	Coral reef	3	27
10	SP_En	R20_10m	R20	10	Coral reef	3	27
11	CY_RB	R20_10m	R20	10	Coral reef	3	27
12	CY_RB	R20_10m	R20	10	Coral reef	3	27
13	AL_CA	R20_10m	R20	10	Coral reef	3	27
14	AL_TA	R20_10m	R20	10	Coral reef	3	27
15	SU_Sa	R20_10m	R20	10	Coral reef	3	27
16	SP_En	R20_10m	R20	10	Coral reef	3	27
17	SU_Sa	R20_10m	R20	10	Coral reef	3	27
18	CY_RB	R20_10m	R20	10	Coral reef	3	27
19	CY_RB	R20_10m	R20	10	Coral reef	3	27
20	SU_Sa	R20_10m	R20	10	Coral reef	3	27
21	CY_RB	R20_10m	R20	10	Coral reef	3	27
22	CY_RB	R20_10m	R20	10	Coral reef	3	27
23	CY_RB	R20_10m	R20	10	Coral reef	3	27
24	AL_TA	R20_10m	R20	10	Coral reef	3	27
[truncated: 149,326 more rows]

## Sheet: Survey data
Ecosystem	Code location	Temperature	Salinity	Surface area	Maximum depth	Connectivity	Habitat	Shannon index	Group richness	Distance to human activity	Latitude	Longitude	UTM_Easting	UTM_Northing	Hard coral														Soft coral			Crustose Coralline Algae	Turfalgae	Sponge								Macroalgae						Benthic cyanobacteria mats
															Branching Acropora	Digitate Acropora	Encrusting Acropora	Submassive Acropora	Tabulate Acropora	Branching coral	Encrusting coral	Foliose coral	Massive coral	Submassive coral	Mushroom coral	Heliopora	Millepora	Tubipora	Gorgonian	Xenia	Other softcoral	Crustose Coralline Algae	Turfalgae	Ball sponge	Branching sponge	Digitate sponge	Encrusting sponge	Excavating sponge	Massive sponge	Tube sponge	Other sponge	Caulerpa	Cladophora	Halimeda	Padina	Sargassum	Other macroalgae	Lyngbya	Red-brown mats
Marine lake	Papua22	37.6	18.5	23100	12	0.1	>32°C marine lake	1.55971	8	NA	NA	NA	NA	NA	0	0	0	0	0	0	0	0	0	0	0	0	0	0	0	0	0	0	5.46067	0	0.343145	0	11.039	0	0	0	0	0	0	0	0	0	0	0	0
Marine lake	Papua21	34.9	23.9	18950	13	0.1	>32°C marine lake	1.18895	10	NA	NA	NA	NA	NA	0	0	0	0	0	0	0	0	0	0	0	0	0	0	0	0	0	0	6.73482	0.307594	6.68787	0	9.52363	0	0	0	0	33.8204	0.85443	0	0	0	0	0	0
Marine lake	Papua7	35.4	15.3	9700	8	0.2	>32°C marine lake	1.21658	8	NA	NA	NA	NA	NA	0	0	0	0	0	0	0	0	0	0	0	0	0	0	0	0	0	0	11.0931	0	0	0	1.532	0	0	0	0	0	0	0	0	0	0	0.293609	17.6988
Marine lake	Papua2	33.5	25.3	12200	7	0.2	>32°C marine lake	1.22167	24	NA	NA	NA	NA	NA	0	0	0	0	0	0	0	0	0	0	0	0	0	0	0	0	0	0	8.64378	1.03685	6.05807	0.26247	8.17536	0.787409	1.11458	1.80158	0.615236	0	4.41921	25.9184	0.746578	0	0.635759	0.8347	0.249443
Marine lake	Papua3	32.4	27.4	20800	8	0.5	>32°C marine lake	1.51799	17	NA	NA	NA	NA	NA	0	0	0	0	0	0	0	0	0	0	0	0	0	0	0	0	0	1.96852	5.52802	1.16316	0	0.376926	15.2188	0	0.753852	0.997253	0	1.57247	0	0	0	0	6.42254	0	2.37405
Marine lake	Papua6	31.8	28.3	2950	12	0.8	31-32°C marine lake	1.87541	16	NA	NA	NA	NA	NA	0	0	0	0	0	0	0	0	0	0	0	0	0	0	0	0	0	0.716834	8.52994	0	0	0	2.47899	0	0	0.266135	0	5.43303	11.3114	0	0	0	3.45613	0.255876	11.1247
Marine lake	Papua4	31.7	26	13750	20	0.8	31-32°C marine lake	1.51398	19	NA	NA	NA	NA	NA	0	0	0	0	0	0	0	0	0	0	0	0	0	0	0	0	0	1.43293	3.33771	2.00907	0.245701	0.942691	3.13288	0	5.8083	0.347473	0	0	16.3469	0	0	0	5.82312	0	5.80125
Marine lake	Papua18	31.6	28.7	7000	5	0.8	31-32°C marine lake	1.50043	12	NA	NA	NA	NA	NA	0	0	0	0	0	0	0	0	0	0	0	0	0	0	0	0	0	0	21.9745	0.325521	0	0	5.48818	3.55985	0	0	0	0	0	0	0	0	0	0	18.7013
Marine lake	Papua5	31.3	29.1	3700	5	0.3	31-32°C marine lake	0.745336	14	NA	NA	NA	NA	NA	0	0	0	0	0	0	0	0	0	0	0	0	0	0	0	0	0	0	0.767732	0.829245	2.01234	0	4.97547	0	0	0	0	0	35.965	0	0.480334	0	3.08688	0	0.44325
Marine lake	Papua15	30.5	30.2	10300	34	0.9	<31°C marine lake	1.6841	25	NA	NA	NA	NA	NA	0	0	0	0	0	0	9.52677	0.952659	3.13615	0.431374	1.56537	0	5.54124	0	0	0.746123	0	17.9781	10.3758	0	0	0.249054	4.65677	5.04133	0	0	0	0	0	0	0	0	2.70026	0	1.9051
Marine lake	Papua11	30.7	28.4	27300	9	0.8	<31°C marine lake	2.15882	27	NA	NA	NA	NA	NA	0.357272	0	0	0	0	1.62466	0.618954	0	10.437	0.841881	0.238027	0	3.79786	0	0	0	0	2.56252	11.6937	1.11316	1.62479	1.40819	9.19087	6.20236	1.50399	0.673243	0.476054	0.357272	0	0	0	0	2.90135	0	6.53948
Coral reef	R1	29	34	NA	5	NA	Reef 5m	1.93261	26	0.79	-1.93393	130.378	653282	9.78618e+06	1.08673	0	0	0	0	3.6464	1.97606	0	3.19845	1.70211	0.848938	0	2.31933	0	2.47524	0	1.003	10.3264	16.0466	0	0	0	8.1019	2.39665	0.579082	0	0	0	0	1.2079	1.32659	0.35896	12.7964	0	13.6186
Coral reef	R2	29	34	NA	5	NA	Reef 5m	2.03737	29	1.57	-1.94115	130.383	653826	9.78538e+06	1.93857	0	0.34609	0	0	3.66269	2.71523	1.64777	3.74619	2.37367	1.49718	0	2.16569	0	2.31572	0	0.34609	8.50235	10.2952	0	2.70887	0	6.81396	0.330298	0.330298	0	0.330298	0	0	2.48165	1.41984	1.08495	15.0826	0	13.5233
Coral reef	R3	29	34	NA	5	NA	Reef 5m	2.43442	27	1.3	-1.95003	130.481	664668	9.78439e+06	1.40544	0	0	0	0	3.70549	3.22033	3.58264	5.30559	0.749304	2.30608	0	1.31654	0	1.3461	0.426347	4.21749	6.07528	11.565	0	0.301473	0	5.47747	0	0	0.426347	0.327059	0	0	0.301473	5.13311	8.86191	8.35694	0	5.44645
Coral reef	R4	29	34	NA	5	NA	Reef 5m	2.0755	22	2.61	-1.99833	130.472	663714	9.77905e+06	18.5189	0	0	0	0	4.06145	2.22302	4.26179	1.38734	1.33373	4.90268	1.37795	4.84385	0	0.324785	0	0	8.05642	13.4657	0	0	0	7.86385	0	0	0	0	0	0	0.451215	0.974355	1.21523	8.33624	0	4.65174
Coral reef	R5	29	34	NA	5	NA	Reef 5m	2.53611	26	2.91	-1.98371	130.515	668538	9.78066e+06	0.967387	0	0	0	0	3.03523	7.33697	1.79994	5.22014	1.1691	2.72551	0	0	2.90438	0.880187	1.35321	2.93331	6.82133	10.8467	0.329871	0	0	5.75045	0	1.66504	0	0.82626	0	0	0.839226	0	0	4.02396	0	3.86832
Coral reef	R6	29	34	NA	5	NA	Reef 5m	2.60419	34	3.61	-1.98417	130.522	669315	9.78061e+06	2.34154	0	0.516798	0.365432	4.31407	1.89884	7.41171	6.46819	8.23384	2.00271	0.641615	0	0	0.632946	1.82367	0.692881	1.81312	3.61551	9.67497	0	0.721483	0	6.10956	0.585849	0.545338	0.286939	1.4301	0	0	0.864737	0	0	1.66195	0	6.06836
Coral reef	R7	29	34	NA	5	NA	Reef 5m	2.26842	24	8.54	-1.99092	130.566	674224	9.77986e+06	8.51677	0	0	0	1.26786	1.94755	4.26521	4.74231	2.6776	0.532607	4.86452	0	0.563553	0	5.03872	0	0	10.0929	12.7518	0.88463	0	0	4.96575	0.434872	0	0	0	0	0	1.19213	2.29751	0	2.85455	1.19095	7.71003
Coral reef	R8	29	34	NA	5	NA	Reef 5m	2.25733	24	8.04	-2.0002	130.559	673382	9.77883e+06	7.73126	0	0	0.335944	0.888824	4.91549	2.3605	2.94901	9.62551	2.59573	2.04165	0	2.97413	0	0	1.1142	2.08437	13.4529	2.44036	0	0	0	7.53124	1.84486	0	0	0	0	0	0.956944	0	0	4.30686	3.46554	5.74734
Coral reef	R9	29	34	NA	5	NA	Reef 5m	2.42709	25	1.65	-2.044	130.361	651308	9.77401e+06	4.57419	0.580203	0	0	6.85359	4.78396	3.5487	3.94678	4.28849	1.474	2.88917	0	2.47053	0	2.91955	0	5.42045	3.52345	12.6439	0	0.963401	0	6.46235	0.301592	0	0.426516	0	0	0	0	0.615803	0	6.47406	0	5.4554
Coral reef	R10	29	34	NA	5	NA	Reef 5m	2.40181	22	1.87	-2.05393	130.379	653345	9.77291e+06	8.43143	0	0	0	0	3.59802	3.25724	4.03739	4.15814	1.25889	1.7575	0	0	0	3.4575	1.14775	7.19488	3.6727	12.1266	0.430311	0.608552	0	5.18251	0	2.12977	1.19989	0	0	0	0	3.20552	0	7.3259	0	8.42935
Coral reef	R11	29	34	NA	5	NA	Reef 5m	2.27636	28	7.28	-2.06847	130.478	664335	9.77129e+06	7.13281	1.48846	0	0	2.04206	1.24345	4.53336	0	7.50713	0	1.21058	0	0	1.37148	0.479789	0.696338	6.54333	6.86595	14.4638	0.311412	0.678524	0	5.30028	0	1.20262	0	0	0	0	0	0	0	5.56848	0.587619	9.56633
Coral reef	R12	29	34	NA	5	NA	Reef 5m	2.37106	33	2.02	-2.11642	130.437	659835	9.766e+06	3.43146	0	0.508108	0	0.718573	2.21146	7.33398	4.31071	6.51531	0.318285	1.64413	0	0	0	6.77299	0.293356	1.87058	2.97087	11.3788	0.647299	1.86467	0	11.4174	0	0.569869	0.904998	0.465296	0.414869	0	1.15541	2.51504	0	2.90845	0	6.16091
Coral reef	R13	29	34	NA	5	NA	Reef 5m	2.21906	24	8.16	-2.14715	130.484	665063	9.76259e+06	13.6268	0	1.93574	0	0	4.99881	2.22395	0.320685	2.63332	0	2.59833	0	0	0	1.43415	1.92322	4.76712	10.7295	3.7981	0	0.7036	0	7.83185	0	0	0	0	0	0	3.61201	0	0	3.64297	0	7.29616
Coral reef	R14	29	34	NA	5	NA	Reef 5m	2.23229	28	0.21	-2.18887	130.598	677694	9.75797e+06	1.67172	0	0	0	0	0.799025	7.4694	1.36575	2.2804	3.84713	0.455177	0	0.799025	1.03464	2.07939	1.58517	6.18243	7.01373	13.4772	1.23243	1.1655	0	12.9926	0	0.9419	1.67289	0	0	0	0	0	0	2.40329	0	10.9604
Coral reef	R15	29	34	NA	5	NA	Reef 5m	2.40154	26	0.7	-2.21647	130.466	663011	9.75493e+06	1.91007	1.3839	0.528397	1.32977	2.70705	2.86421	7.63019	0	9.00117	1.60623	0.332029	0	0	0	0	0	6.84765	5.40529	12.4359	0	0	0	6.81557	0.636487	0	0	0	0	0	0	0	0	7.53244	0	10.885
Coral reef	R16	29	34	NA	5	NA	Reef 5m	2.22809	28	4.23	-2.22016	130.527	669854	9.75452e+06	2.73648	0.330704	0	0	0.467687	2.53113	9.4333	1.79493	4.70259	1.08114	0.904476	0	0.904064	0	0	0.812104	13.2213	9.14961	9.45401	0	2.20983	0	8.6076	0.330704	0.340401	0.4814	0.671106	0	0	0	0	0	3.7666	0	10.9965
Coral reef	R17	29	34	NA	5	NA	Reef 5m	2.18483	27	2.11	-2.25469	130.572	674846	9.75069e+06	2.36908	1.48674	2.01634	3.24862	1.74161	0.734311	4.30922	0.321142	3.60727	1.01641	0.734311	0	0.347632	0	0	0	6.47639	11.3634	6.02084	0.347632	0	0	5.12306	0.347632	0.328394	0	0	0	0	0	0	0	1.86651	0.454164	11.8842
Coral reef	R18	29	34	NA	5	NA	Reef 5m	2.63922	33	0.19	-0.497971	130.67	685842	9.94494e+06	3.88393	0.97634	0.841845	3.26747	2.26011	8.95374	4.01688	2.7497	4.84816	1.83058	2.54717	0	0.281243	0.287439	0.560602	0.287439	3.56902	5.99156	9.04878	0	0.90591	0	5.52011	0	1.81682	0	0.562485	0	0	5.17252	0	0	1.83452	0	7.89103
Coral reef	R19	29	34	NA	5	NA	Reef 5m	2.28227	27	1.11	-0.515063	130.463	662816	9.94305e+06	9.33625	0.335553	0	0	0	3.24874	3.14599	0.635196	4.60986	0	0.698554	0	1.06111	0	1.10871	4.63878	1.4839	2.19306	9.41994	0.335553	0.947924	0	6.59469	0	0	0.331823	0.335553	1.46772	0	7.91751	0	0	1.18601	0	10.0521
Coral reef	R20	29	34	NA	5	NA	Reef 5m	2.24392	22	2.89	-0.548422	130.497	666606	9.93936e+06	1.70397	0	0	0	1.50018	7.08247	8.14178	6.65761	2.36937	2.81765	0.327366	0	1.11302	0	0.327366	6.98517	3.09492	3.30595	13.1313	0	0	0	3.46281	0	0	0	0.732012	0	0	0	0	0	0	0	6.29904
Coral reef	R21	29	34	NA	5	NA	Reef 5m	2.21075	20	0.29	-0.605162	130.556	673164	9.93309e+06	8.25529	0	0	0	2.50533	9.98334	3.15711	3.35341	1.95335	0.864901	3.73589	0.353862	1.03589	0.382637	0	0.482264	0.382637	7.9874	7.32954	0	0.341012	0	7.11814	0	0	0	0	0	0	0	0	0	0	0	12.2044
Coral reef	R22	29	34	NA	5	NA	Reef 5m	2.49562	27	0.58	-0.56838	130.66	684691	9.93715e+06	6.39207	0	0	0	1.52709	8.21943	4.37123	4.01048	1.83981	0.926858	3.11778	0	4.07841	0	0	3.55482	9.96229	3.94605	9.75265	0	0	0	5.98699	0	0	0	0.630622	0.327194	0	4.27401	0	0	0.76615	0.327194	10.6008
Coral reef	R23	29	34	NA	5	NA	Reef 5m	2.54834	25	0.55	-0.560156	130.665	685322	9.93806e+06	5.95957	0.991699	0	0	2.16343	6.38583	5.59713	8.39685	3.43465	0.494705	1.53227	0	1.87292	1.22091	1.62484	0	2.18689	5.61431	5.88315	0.29208	0	0	6.45194	0	0	0	2.09746	0	0	2.61053	0	0	1.917	0	10.8771
Coral reef	R1	29	34	NA	10	NA	Reef 10m	1.48778	22	0.79	-1.93393	130.378	653282	9.78618e+06	0	0	0	0	0	0	1.82631	0	2.14494	2.18771	0.435255	0	0.986317	0	0.400465	0	0	12.6318	21.5974	0	0	0	8.42942	1.60186	0	0.435255	0	0	0	0.400465	0.800931	0	11.7599	0	4.32653
Coral reef	R2	29	34	NA	10	NA	Reef 10m	2.03737	29	1.57	-1.94115	130.383	653826	9.78538e+06	1.93857	0	0.34609	0	0	3.66269	2.71523	1.64777	3.74619	2.37367	1.49718	0	2.16569	0	2.31572	0	0.34609	8.50235	10.2952	0	2.70887	0	6.81396	0.330298	0.330298	0	0.330298	0	0	2.48165	1.41984	1.08495	15.0826	0	13.5233
Coral reef	R3	29	34	NA	10	NA	Reef 10m	2.057	25	1.3	-1.95003	130.481	664668	9.78439e+06	0	0	0	0	0	0.334063	4.03421	2.88215	6.27078	0	3.52282	0	0.334063	0	3.33537	0.508507	0.832005	2.02549	14.8868	0	0	0	3.50785	0	1.24995	0.578613	0.508507	0	0	0.508507	3.6733	2.74777	9.40148	0	6.81123
Coral reef	R4	29	34	NA	10	NA	Reef 10m	2.08157	17	2.61	-1.99833	130.472	663714	9.77905e+06	8.56567	0	0	0	0	2.78791	4.0816	11.3343	5.46409	0	3.94495	0	0	0	0	0	2.73706	5.29209	14.7286	0.34749	0.515251	0	4.19653	0.34749	0	0	0	0	0	0	1.98175	0	7.18154	0	6.71531
Coral reef	R5	29	34	NA	10	NA	Reef 10m	2.52985	32	2.91	-1.98371	130.515	668538	9.78066e+06	0.4844	0	0.88439	0	1.42604	0.559337	4.3036	6.70085	7.44037	0.707871	1.29804	0	0	0	2.76862	0.821563	4.35929	5.28671	10.2861	0.917855	0	0	6.10712	0.335402	1.90458	0.395511	0	0	0	0	0	0	3.42156	0	4.14127
Coral reef	R6	29	34	NA	10	NA	Reef 10m	2.37647	29	3.61	-1.98417	130.522	669315	9.78061e+06	2.74735	0	0	0	1.93121	0.865725	5.18011	3.89465	6.3359	1.4634	0	0	0	0.61216	3.19238	0.816184	2.56064	2.75288	12.5275	0.297992	0.61216	0	6.47723	1.45172	1.47172	0	0	0	0	0	0	0	1.23271	0	7.08563
Coral reef	R7	29	34	NA	10	NA	Reef 10m	2.26646	23	8.54	-1.99092	130.566	674224	9.77986e+06	4.14672	0	0	0	0	1.49115	4.36955	3.23605	3.6151	0	4.33771	0	1.22789	0	3.44213	0	0.31575	6.97703	12.0326	0	0.31575	0	4.75043	0.31575	0	0	0	0	0	4.19408	7.30642	0	11.0362	0.971996	3.0738
Coral reef	R8	29	34	NA	10	NA	Reef 10m	2.17145	21	8.04	-2.0002	130.559	673382	9.77883e+06	11.1721	0	0	0	0.338729	2.88943	2.71899	3.71441	5.02804	0	5.08056	0	2.99257	0	0.338729	0	4.83611	15.7059	4.69257	0	0	0	8.85179	0	0	0	0	0	0	3.28455	0	0	6.69377	0.338729	3.73326
Coral reef	R9	29	34	NA	10	NA	Reef 10m	2.31408	24	1.65	-2.044	130.361	651308	9.77401e+06	2.89244	0	0	0	1.16275	3.73012	7.38098	8.28626	5.24868	1.01605	3.36381	0	0	0	3.2758	0	1.0883	2.52759	12.5241	0.321302	2.718	0	5.51161	1.10918	0	0.466573	0	0	0	0	2.74666	0	6.36802	0	3.36892
Coral reef	R10	29	34	NA	10	NA	Reef 10m	2.50256	28	1.87	-2.05393	130.379	653345	9.77291e+06	3.71356	0	0	0	0	0.41044	6.13108	4.1228	6.61735	1.23132	2.86145	0	0	0.305414	2.4855	0	4.41398	4.2029	11.9134	0.290225	1.38828	0	6.48465	0.910647	3.31527	0.445488	1.17865	0	0	0.290225	5.01905	1.06183	7.17547	0	5.80879
Coral reef	R11	29	34	NA	10	NA	Reef 10m	2.36457	29	7.28	-2.06847	130.478	664335	9.77129e+06	1.63288	0	0	0	2.09445	1.8607	9.98814	2.62259	9.85761	0.748823	2.20347	0	0.307892	1.13249	1.43	2.22855	6.97702	4.88674	11.7415	0	0.313399	0	6.73667	0	0	0	0	0.596636	0	0	0	0	5.73652	0	3.73677
Coral reef	R12	29	34	NA	10	NA	Reef 10m	2.28277	32	2.02	-2.11642	130.437	659835	9.766e+06	2.10057	0	0.32012	0	0.960361	0.889487	8.85532	3.10485	5.9592	0	0.877733	0	0.335022	0	1.58703	1.10253	2.2923	2.55264	12.8172	0.633455	0.905437	0	8.31055	0.580276	0	0.335022	1.21354	0.335022	0	0.335022	1.12299	0	5.21648	0	7.1325
Coral reef	R13	29	34	NA	10	NA	Reef 10m	2.30647	29	8.16	-2.14715	130.484	665063	9.76259e+06	1.84456	0	0	0	0	4.63265	6.03872	1.66459	6.08482	0.523333	1.40279	0	0	1.62058	2.2777	0.302146	2.83288	7.01157	11.3837	0.302146	1.21714	0	10.5998	0.663825	1.25927	0.761965	1.41719	0	0	0	0	0	1.67311	1.13175	5.84756
Coral reef	R14	29	34	NA	10	NA	Reef 10m	1.99726	23	0.21	-2.18887	130.598	677694	9.75797e+06	0	0	0	0	0	0.414946	11.4225	3.94185	0.526846	1.97441	0	0	0	0	2.50947	0	2.35918	6.71458	17.04	0.766343	2.32748	0	13.6953	0	0	0	0	0	0	0	0	0	2.17141	0	10.946
Coral reef	R15	29	34	NA	10	NA	Reef 10m	2.21944	21	0.7	-2.21647	130.466	663011	9.75493e+06	0.473414	0	0	0	0	1.10769	5.38546	0.889127	5.63479	0	0	0	0	0	0.475259	0	11.3391	5.57107	13.2149	0	0	0	6.78753	0	0	0	2.77972	0	0	0	0	0	8.50884	0	12.6327
Coral reef	R16	29	34	NA	10	NA	Reef 10m	2.3553	30	4.23	-2.22016	130.527	669854	9.75452e+06	0.959211	0	0	0	0.621754	1.65865	11.4196	3.9409	8.79433	2.25509	0.314354	0	0	0.538455	2.3258	0	4.67907	8.02104	9.27159	0	1.33247	0	10.303	1.13244	0.628709	0	0.314354	0	0	0	0.702918	0	4.0093	0	9.58087
Coral reef	R17	29	34	NA	10	NA	Reef 10m	2.27201	27	2.11	-2.25469	130.572	674846	9.75069e+06	3.16523	0	0.764292	0.954525	0.899935	4.8563	4.66888	1.88015	4.06366	2.35132	1.41794	0	0.449967	1.13331	0	0	11.4459	9.94107	6.73809	0	0	0	8.31606	0	0	0	1.02111	0	0	0	0	0	4.38901	0.314324	12.0081
Coral reef	R18	29	34	NA	10	NA	Reef 10m	2.09826	25	0.19	-0.497971	130.67	685842	9.94494e+06	2.49388	1.36281	0	0	3.03331	4.85885	5.66857	1.83743	4.43181	0	0.630859	0	0	0	1.19978	0	1.07765	3.29755	14.5319	0	2.89739	0	6.27911	0	1.02473	0	0.848373	0	0	2.874	0	0	0.813842	0.624174	12.2935
Coral reef	R19	29	34	NA	10	NA	Reef 10m	2.43461	29	1.11	-0.515063	130.463	662816	9.94305e+06	10.0799	0	0	0	2.41206	2.74041	4.66568	4.92469	3.47152	1.41819	0.671885	0	0	3.01254	2.89837	1.0173	3.66072	1.84039	8.72847	0	1.57656	0	6.18344	0.475094	1.11592	0	0.298242	0	0	3.55716	0.343825	0	0.679768	0	8.84765
Coral reef	R20	29	34	NA	10	NA	Reef 10m	2.5212	27	2.89	-0.548422	130.497	666606	9.93936e+06	7.74003	1.20839	0	0	4.87544	4.59259	5.14979	10.7308	5.015	0	1.59183	0.948146	0.302232	0.302232	3.17983	5.36046	4.84807	2.66425	9.16768	0	0.45673	0	4.57415	0	0.750378	0.957097	1.55932	0	0	0.432478	0	0	0	0	8.62687
Coral reef	R21	29	34	NA	10	NA	Reef 10m	2.35287	19	0.29	-0.605162	130.556	673164	9.93309e+06	3.56956	0	0	0	3.06218	5.82931	8.31489	2.59476	7.32216	1.72695	2.63177	0	0.338169	0	0	0	0	7.71754	7.40785	0	0	0	9.35903	0	0	0	0	0	0	0.478243	0	0	0	0	11.5107
Coral reef	R22	29	34	NA	10	NA	Reef 10m	2.21118	23	0.58	-0.56838	130.66	684691	9.93715e+06	4.27508	0	0.402704	0	3.00938	2.97248	4.56616	0.402704	5.76541	1.58271	0.961239	0.364943	0	0.364943	0.942826	0	3.44208	5.31013	9.91202	0	0	0	4.42665	1.08562	1.19259	0	0	0	0	0.569509	0	0	0	0	11.0657
Coral reef	R23	29	34	NA	10	NA	Reef 10m	1.98209	27	0.55	-0.560156	130.665	685322	9.93806e+06	6.6948	0.350223	0	0.606604	0.9752	6.87259	1.40651	19.2382	1.61422	1.58799	3.0669	0	0.561439	0.339347	0	3.00515	4.81176	5.953	4.38979	0	0.68762	0	5.656	0	0	0	2.15483	0	0	3.25643	0	0	0.339347	0	12.5639
[truncated: 22 more columns]
